1           **Forward genetic screen for *Caenorhabditis elegans* mutants with a shortened**  
2                           **locomotor healthspan**

3  
4                           Kazuto Kawamura<sup>a1</sup> and Ichiro N. Maruyama<sup>a1</sup>

5  
6     <sup>a</sup>Information Processing Biology Unit, Okinawa Institute of Science and Technology  
7     Graduate University, 1919-1 Tancha, Onna-son, Kunigami-gun, Okinawa, Japan, 904-  
8     0495

9  
10    <sup>1</sup>To whom correspondence may be addressed. Email: [kazuto.kawamura@oist.jp](mailto:kazuto.kawamura@oist.jp) or  
11    [ichi@oist.jp](mailto:ichi@oist.jp)

12  
13    Short Title: Shortened locomotor healthspan

14  
15    Keywords: *elpc-2*, age-related locomotor impairment, forward genetic screen

17 **Abstract:** Two people with the same lifespan do not necessarily have the same  
18 healthspan. One person may retain locomotor and cognitive functions until the end of life,  
19 while another person may lose them during adulthood. Unbiased searches for genes that  
20 are required to maintain locomotor capacities during adulthood may uncover key  
21 regulators of locomotor healthspan. Here, we take advantage of the relatively short  
22 lifespan of the nematode *Caenorhabditis elegans* and develop a novel screening  
23 procedure to collect mutants with locomotor deficits that become apparent in adulthood.  
24 After ethyl methanesulfonate mutagenesis, we isolated five *C. elegans* mutant strains that  
25 progressively lose adult locomotor activity. In one of the mutant strains, a nonsense  
26 mutation in Elongator Complex Protein Component 2 (*elpc-2*) causes a progressive  
27 decline in locomotor function. Mutants and mutations identified in the present screen may  
28 provide insights into mechanisms of age-related locomotor impairment and the  
29 maintenance of locomotor healthspan.  
30

## 31 **Introduction**

32 Locomotor ability indicates an animal's healthspan across many species such as  
33 worms, flies, mice, and humans (Cesari et al., 2009; Grotewiel et al., 2005; Hahm et al.,  
34 2015; Justice et al., 2014). In these species, declines in locomotor capacities can be a  
35 feature of the normal aging process, or a symptom of an age-related disease. Currently,  
36 the genetic regulators that work to prevent age-related declines in locomotor function is  
37 largely unknown.

38 Recent studies have suggested that the genetic bases of lifespan and healthspan  
39 may not completely overlap (Bansal et al., 2015; Iwasa et al., 2010; Tissenbaum, 2012).  
40 From a candidate-based genetic screen, Iwasa *et al.* found that activation of the epidermal  
41 growth factor signaling pathway prolongs adult swimming ability in *C. elegans* without  
42 large effects on lifespan (Iwasa et al., 2010). More examples of genetic pathways that  
43 work to maintain locomotor healthspan may be discovered by carrying out unbiased  
44 searches for mutant animals that show progressive declines in locomotor capacity.

45 A forward genetic screen using *C. elegans* has previously been employed to  
46 identify genes that affect locomotor function during development (Brenner, 1974).  
47 However, unbiased screens that focus on locomotor deficits occurring later in life have  
48 not been carried out, in part due to the difficulty in distinguishing whether symptoms  
49 observed during adulthood were already present during development.

50 In the present study, we established the "Edge Assay" to measure locomotor  
51 ability of hundreds of adult worms at once. Using the Edge Assay, we developed a  
52 screening procedure to remove mutant worms with strong developmental locomotor  
53 defects on the first day of adulthood, and then isolated mutant worms that progressively  
54 lose their locomotor function on the third or fifth days of adulthood. After ethyl  
55 methanesulfonate-mutagenesis, we isolated five mutant strains that progressively lose  
56 their ability to complete the Edge Assay. In one mutant strain, we found that a mutation  
57 in the *elpc-2* gene causes progressive loss of locomotor function. *elpc-2* works with  
58 other Elongator complex genes, *elpc-1* and *elpc-3*, to maintain adult locomotor function  
59 in *C. elegans*. Along with the Elongator complex mutants, isolated mutants from our  
60 screen can be used as tools to explore mechanisms that work to maintain adult  
61 locomotor function in *C. elegans*.

62

## 63 **Results**

### 64 **The "Edge Assay" can test locomotor function of hundreds of worms**

65 Our forward genetic screen isolates mutant worms that progressively lose  
66 locomotor function. We established the Edge Assay to measure locomotor activity of  
67 hundreds of worms at once. The Edge Assay is carried out on a 9-cm agar plate with *E.*  
68 *coli* bacterial feed spread only on the outer edge of the plate. Up to a few hundred adult  
69 worms are placed on the center of the plate where there is no food (Fig. 1A; Fig. S1).

70 Motile worms reach the *E. coli* on the edge of the plate, while worms with defects in  
71 locomotion or chemotaxis remain in the center of the plate.

72 On the first day of adulthood, 91.3% of wild-type worms reached the edge in 15  
73 min and 99.6% reached the edge in 60 min (Fig. 1B; Fig. S1). *C. elegans* mutant strains  
74 that are defective in the function of neurons (*unc-13(e51)*, *unc-43(e408)*) (Maruyama and  
75 Brenner, 1991; Reiner et al., 1999) or muscles (*unc-54(e190)*) (MacLeod et al., 1981)  
76 could not reach the edge in 15 min on the first day of adulthood (Fig. 1C). After 60 min,  
77 26% of *unc-54(e190)* mutants, 6.4% of *unc-43(e408)* mutants, and 0% of *unc-13(e51)*  
78 mutants reached the edge (Fig. 1C). Therefore, carrying out the Edge Assay for 15 min  
79 on the first day of adulthood can separate wild-type worms from worms with strong  
80 developmental locomotor defects.

81 On average, over 90% of wild-type worms could complete the Edge Assay in 60  
82 min during the first five days of adulthood (Fig. 1B). A *C. elegans* model of amyotrophic  
83 lateral sclerosis (Hsa-sod-1(127X)) (Gidalevitz et al., 2009) showed a significant  
84 reduction in Edge Assay completion rate compared to wild-type worms on the fifth day  
85 of adulthood (Fig. 1D). Therefore, carrying out the Edge Assay for 60 min on the fifth  
86 day of adulthood can separate wild-type worms from worms that progressively lose their  
87 locomotor activity.

88

### 89 **Isolation of mutants that progressively lose locomotor activity during adulthood**

90 We mutagenized wild-type N2 worms using ethyl methanesulfonate, and  
91 screened 3352 F2 offspring from 500 F1 worms (1000 genomes) (Table S1). We carried  
92 out the Edge Assay for the mutagenized F2 offspring on the first day of adulthood (Fig.  
93 2A). To remove worms with developmental defects, worms that could not complete the  
94 Edge Assay in 15 min were aspirated away (Fig. 2A). Only worms that completed the  
95 Edge Assay on the first day of adulthood were kept for further screening. On the third and  
96 fifth days of adulthood, we tested the worms again with the Edge Assay and collected  
97 slow or uncoordinated mutants that remained near the center of the Edge Assay plate after  
98 60 min (Fig. 2A). By removing worms with strong developmental defects on the first day  
99 of adulthood, we were able to isolate worms that progressively lost locomotor function  
100 during adulthood. We isolated 22 viable mutants, and created individual strains from  
101 those mutants (Table S1). Five of those mutant strains reproducibly showed progressive  
102 deficits in completing the Edge Assay during adulthood (Fig. 2B).

103 To determine whether isolated mutant strains have deficits in locomotor function  
104 and not sensory function or search behavior, we measured locomotor function of worms  
105 on an agar plate without food. We recorded one-minute videos of 15 worms freely moving  
106 on a plate, and measured the maximum velocities and total travel distances for each worm.  
107 For each strain, we recorded three plates of 15 worms on the first, third, and fifth days of  
108 adulthood. All isolated mutant strains showed significantly greater reductions in  
109 maximum velocity and travel distance from the first to fifth days of adulthood compared

110 to wild type except for *ix240* worms (Fig. 3A, B, D; Fig. S2A–D; Fig. S3A–D). In the  
111 *ix240* worms, progressive deficits other than locomotor function, such as sensory function  
112 or search behavior, may cause the reduction in Edge Assay completion rate.

113

#### 114 ***ix241* and *ix243* mutant strains show progressive decline in locomotor function**

115 *ix241* and *ix243* worms were backcrossed with the parental N2 strain to reduce  
116 the number of mutation sites that do not affect locomotor function. After each backcross,  
117 we checked for individual lines that still showed a progressive decline in locomotor  
118 function. We measured the maximum velocity and travel distance of individual worms  
119 on an agar plate without food on the first, third, and fifth days of adulthood. *ix241* and  
120 *ix243* worms still showed significant reductions in both maximum velocity and travel  
121 distance after the fourth backcross (Fig. 3A, B, D; Fig. S3A–D).

122 To check whether *ix241* and *ix243* worms were simply aging faster than wild-  
123 type worms, we measured lifespans of the two strains. The lifespan of *ix241* worms was  
124 not significantly shortened compared to that of wild type (Fig. 3E; Table S2). The median  
125 lifespan of the *ix243* worms was shortened by two days (Fig. 3C; Table S2). To compare  
126 relative reductions in lifespan and locomotor healthspan, we measured the maximum  
127 velocities of wild type and *ix243* worms for 10 days (Fig. S4A). We quantified the percent  
128 decrease in lifespan by comparing the areas under the survival curves of wild type and  
129 *ix243* worms (Fig. S4B). We quantified the percent decrease in locomotor healthspan by  
130 comparing the areas under the decline in maximum velocity curves of wild type and *ix243*  
131 worms (Fig. S4C). For *ix243* worms, there is an average 11.5% reduction in lifespan,  
132 while there is a significantly greater 18.5% reduction in locomotor healthspan (Fig. S4D).

133 *ix243* worms take a 13.9% longer time to reach adulthood (Table S3). The  
134 developmental delay was taken into account for locomotor and lifespan measurements by  
135 allowing *ix243* worms an extra 10 h to develop, and starting locomotor and lifespan  
136 measurements from the first day of adulthood. *ix243* worms show a 17.7% decrease in  
137 maximum locomotor activity on the first day of adulthood compared to wild-type worms  
138 (Fig. 3B). The deficit in locomotor capacity compared to wild-type worms increases to  
139 54.8% on the fifth day of adulthood (Fig. 3B). These results suggest that the *ix243* mutant  
140 allele has modest negative effects on development and lifespan, with relatively stronger  
141 negative effects on locomotor healthspan.

142 *ix241* worms take 4.0% longer to reach adulthood (Table S3) and show an 18.1%  
143 decrease in maximum locomotor activity on the first day of adulthood compared to wild-  
144 type worms (Fig. 3D). The deficit in locomotor function compared to wild-type worms  
145 increases to 43.0% on the fifth day of adulthood (Fig. 3D). The *ix241* mutant allele has  
146 no negative effect on lifespan, a modest negative effect on development, and a relatively  
147 stronger negative effect on locomotor healthspan.

148

149 **Nonsense mutation in *elpc-2* causes progressive loss of adult locomotor function in**  
150 ***ix243* worms**

151 We used whole genome sequencing and a modified version of the sibling  
152 subtraction method to identify the causative mutation site in the *ix243* strain (Fig. S5)  
153 (Joseph et al., 2018). Mutations were evenly induced on all chromosomes in the *ix243*  
154 mutant strain before backcrossing (Fig. 4A). Many mutations remained on Chromosome  
155 III after comparing mutations in backcrossed strains that show a progressive loss of  
156 adult locomotor function and subtracting mutations in backcrossed strains that do not  
157 show progressive loss of adult locomotor function (Fig. 4B; Table S4). A nonsense  
158 mutation from TGG to TAG within the protein coding region of *elpc-2* was predicted to  
159 disrupt protein function (Fig. 4C; Table S4). Presence of the *elpc-2* mutation site was  
160 confirmed by Sanger sequencing (Fig. 4D).

161 To test whether loss of *elpc-2* causes a progressive decline in locomotor  
162 function, we injected a genomic fragment of *elpc-2* including 2090-base pairs (bp)  
163 upstream of the start codon and 851-bp downstream of the stop codon in the *ix243*  
164 mutant strain. The wild-type *elpc-2* fragment rescued the progressive loss of adult  
165 locomotor function (Fig. 4E, F; Fig. S6A, B). These results suggest that *elpc-2* is  
166 required for maintenance of adult locomotor function in *C. elegans*. The *ix243* mutant  
167 strain is the first reported mutant of the *elpc-2* gene in *C. elegans*.

168

169 **The Elongator complex is required to maintain locomotor function**

170 ELPC-2 is a component of the Elongator complex. In *C. elegans*, there are four  
171 predicted components of the Elongator complex (ELPC1–4) (Solinger et al., 2010). To  
172 test whether functional loss of *elpc-2* causes the locomotor defect independently or as  
173 part of the Elongator complex, we measured locomotor activity of strains carrying  
174 deletions in *elpc-1* and *elpc-3*. We found that *elpc-1(tm2149)* and *elpc-3(ok2452)*  
175 mutant strains also cannot maintain locomotor function during adulthood (Fig. 5A, B).  
176 *elpc-1(tm2149);elpc-2(ix243)* and *elpc-2(ix243);elpc-3(ok2452)* double mutants did not  
177 show additive deficiencies in locomotor function (Fig. 5C; S7A–H). These results  
178 suggest that proper functioning of the entire Elongator complex is necessary to maintain  
179 locomotor healthspan. We assessed the expression pattern of *elpc-2* by creating an *elpc-*  
180 *2p::GFP* transcriptional reporter that expresses GFP under control of the *elpc-2*  
181 promoter. The transcriptional reporter was broadly expressed in many tissues including  
182 head and body wall muscles, head neurons, pharynx, canal cell, coelomocytes, intestine,  
183 and tail (Fig. S8A–C). The expression pattern of *elpc-2* overlaps with previously  
184 reported expression of *elpc-1* in the pharynx, head neurons, and body wall muscles  
185 (Chen et al., 2009).

186

187 **Loss-of-function mutation in *tut-1* also causes progressive decline in locomotor**

188 **function**

189 Mutants for *elpc-1* and *elpc-3* have previously been reported to modify the  
190 wobble uridine (U<sub>34</sub>) of tRNA by adding carbamoylmethyl (ncm) and  
191 methoxycarbonylmethyl (mcm) side chains to the 5' carbon of U<sub>34</sub> (Chen et al., 2009;  
192 Nedialkova and Leidel, 2015). Wobble uridines with the mcm<sup>5</sup> modification are further  
193 modified by TUT-1 to add a thio-group at the 2' carbon to create mcm<sup>5</sup>s<sup>2</sup>U (Chen et al.,  
194 2009). In wild-type worms, only ncm<sup>5</sup> and mcm<sup>5</sup>s<sup>2</sup> modifications are present (Chen et  
195 al., 2009). In *tut-1(tm1297)* mutants, an mcm<sup>5</sup> modification was observed, which is not  
196 normally present in wild-type worms (Chen et al., 2009). In *elpc* mutants, an s<sup>2</sup>  
197 modification was observed, which is not normally present in wild-type worms (Chen et  
198 al., 2009).

199 To check whether loss of tRNA thiolation could cause a progressive decline in  
200 locomotor function, we measured the locomotor function of *tut-1(tm1297)* mutant  
201 worms. *tut-1(tm1297)* mutant worms showed a significantly greater decline in  
202 locomotor function during adulthood compared to wild-type worms, indicating that  
203 tRNA modifications may be a general mechanism involved in maintenance of  
204 locomotor healthspan in *C. elegans* (Fig. 6A; Fig. S9A, B).

205 The *elpc-2(ix243);tut-1(tm1297)* double mutant showed synthetic effects for  
206 locomotor function and for developmental maturation. *elpc-2(ix243);tut-1(tm1297)*  
207 double mutant worms showed a strong defect in locomotor function on the first day of  
208 adulthood and a significantly greater reduction in maximum velocity and travel distance  
209 during adulthood relative to either of the single mutants (Fig. 6A; Fig. S9A, B). In  
210 addition, *elpc-2(ix243);tut-1(tm1297)* double mutant worms took almost twice as long  
211 to reach adulthood (145.4 h) compared to *elpc-2(ix243)* worms (80.2 h) or *tut-*  
212 *1(tm1297)* worms (82.0 h) (Table S3; Table S5). The synthetic effects may be explained  
213 by the complete absence of U<sub>34</sub> modifications in the *elpc-2(ix243);tut-1(tm1297)* double  
214 mutant strain. The presence of the s<sup>2</sup> modification in the *elpc* mutants, and the presence  
215 of the mcm<sup>5</sup> and ncm<sup>5</sup> modifications in the *tut-1* mutant may enable partial tRNA  
216 functionality and allow relatively proper development and partial capacities to maintain  
217 locomotor function (Fig. 6B).

218

219 **Discussion**

220 In this study, we established the Edge Assay to simultaneously measure  
221 locomotor function of up to a few hundred adult worms. For our forward genetic screen,  
222 we used the Edge Assay to remove worms with strong developmental locomotor defects,  
223 and isolated worms with locomotor deficits that become apparent in adulthood. By  
224 carrying out the Edge Assay on the first day of adulthood, we were able to remove worms  
225 with strong developmental locomotor defects and overcome the difficulty of  
226 distinguishing developmental and progressive locomotor deficit mutants.

227 The Edge Assay may be used for a variety of applications involving locomotor

228 function. For example, the Edge Assay can be used in suppressor screens to search for  
229 mutant worms that show improvements in locomotor function of previously characterized  
230 *C. elegans* models of neurodegenerative disease. It may also be possible to use the Edge  
231 Assay to screen for other types of progressive declines in functional capacity such as  
232 sensory or cognitive deficits by replacing the food ring with specific chemicals or learned  
233 cues.

234 The *ix241* and *ix243* mutant strains show similar declines in locomotor function,  
235 but have different phenotypes in regard to lifespan. This suggests that genes that regulate  
236 lifespan and locomotor healthspan may not completely overlap. In terms of improving  
237 quality of life, genetic regulators of healthspan may be better therapeutic targets than  
238 regulators of lifespan. Further studies and genetic screens that focus on healthspan-related  
239 phenotypes may provide novel insights into mechanisms that regulate healthspan and  
240 quality of life across many species.

241 In the *ix243* mutant strain, we found that *elpc-2* is required to maintain locomotor  
242 healthspan, and works as part of the Elongator complex. The Elongator complex is an  
243 evolutionarily conserved protein complex that consists of six subunits in *S. cerevisiae*, *A.*  
244 *thaliana*, *M. musculus*, and humans (Creppe and Buschbeck, 2011; Dauden et al., 2017).  
245 ELP1–ELP3 form the core complex, and ELP4–ELP6 form a sub-complex (Creppe and  
246 Buschbeck, 2011). In *C. elegans*, there are currently only four predicted homologs of the  
247 Elongator complex (*elpc-1–4*). From the present study, loss-of-function mutations in *elpc-*  
248 *1*, *elpc-2*, and *elpc-3* caused a shortened locomotor healthspan. Proper functioning of the  
249 Elongator complex may require multiple or all components of the complex (Dauden et  
250 al., 2017). The present work suggests that the Elongator complex is essential in  
251 maintenance of locomotor healthspan.

252 Allelic variants of ELP3, the catalytic subunit of the Elongator complex, were  
253 found to be associated with amyotrophic lateral sclerosis (ALS) in three human  
254 populations (Simpson et al., 2009). Risk-associated alleles have lower levels of ELP3 in  
255 the cerebellum and motor cortex of ALS patients, and protection-associated alleles have  
256 higher levels of ELP3 (Simpson et al., 2009). Overexpression of ELP3 reduced levels of  
257 axonopathy in the SOD1<sup>A4V</sup> zebrafish model of ALS and SOD1<sup>G93A</sup> mouse model of ALS  
258 (Bento-Abreu et al., 2018). The present work complements studies that have been  
259 performed in the context of ALS, and suggest that loss of the Elongator complex alone  
260 can cause locomotor deficits during adulthood in *C. elegans*. Future therapies that target  
261 multiple subunits of the Elongator complex may provide more robust effects than  
262 therapies that target only the catalytic ELP3 subunit.

263 ELP2 mutations were reported as the causative mutations in a familial form of  
264 neurodevelopmental disability (Cohen et al., 2015). Patients who are compound  
265 heterozygotes for two different ELP2 missense mutations demonstrate a lack of motor  
266 control starting in early development, severe intellectual disability, and progressive loss  
267 of locomotor function (Cohen et al., 2015). In our newly isolated *elpc-2(ix243)* strain, we



268 also see deficits in locomotor function on the first day of adulthood and a delay in  
269 development (Fig. 3A, B; Fig. S3A, B; Table S3). Since the amino acid sequences of *C.*  
270 *elegans* ELPC-2 and human ELP2 are highly conserved (Fig. S10), some aspects of the  
271 neurodevelopmental dysfunctions that result from the human ELP2 mutation may be  
272 modeled in our *elpc-2(ix243)* mutant strain.

273 The Elongator complex was originally identified as a transcriptional regulator  
274 associated with RNA polymerase II (Otero et al., 1999). However, follow-up studies have  
275 found that the main functions of the Elongator complex may involve tRNA modification  
276 (Chen et al., 2009; Huang et al., 2005), and tubulin acetylation (Solinger et al., 2010).  
277 The tRNA thiolation mutant, *tut-1(tm1297)*, also showed a progressive decline in  
278 locomotor function. In yeast, tRNA modifications are important for proper translation and  
279 folding of proteins (Nedialkova and Leidel, 2015). tRNA modifications may affect  
280 locomotor healthspan by regulating translation efficiency and protein folding.

281 Starting from an unbiased forward genetic screen using *C. elegans*, we have  
282 found that mutations in Elongator complex and *tut-1* cause progressive declines in  
283 locomotor function during adulthood. Future screening procedures that utilize the Edge  
284 Assay, and further analysis of the isolated mutants from the present screen may provide  
285 insights into how locomotor function is maintained during adulthood.

286

## 287 **Methods**

### 288 **Strains**

289 *C. elegans* Bristol N2 strain was used as wild type. Worms were cultivated on  
290 Nematode Growth Media (NGM) agar plates with *E. coli* strain OP50 at 20°C (Brenner,  
291 1974). See Supplementary Information Appendix for strains used in the present study.

292

### 293 **Edge Assay**

294 Edge Assay plates were prepared by pouring 16 mL of NGM agar into a circular 9 cm  
295 plate. NGM plates were dried overnight with the lid on at 25°C, then kept at 4°C until  
296 use. On the day before the Edge Assay, a total of 100 µL of *E. coli* suspension was  
297 spotted on four spots near the edge of the NGM plate. The tip of a 50 mL serological  
298 pipette was briefly placed over a flame to smoothen the tip. The NGM plate was placed  
299 on an inoculating turntable and the smoothened pipette tip was held against the *E. coli*  
300 drop. The plate was slowly rotated while holding the pipette tip still. The plate was  
301 rotated 360° to spread the *E. coli* around the edge of the whole plate. Plates were  
302 incubated overnight at 25°C and used the next day. Synchronized worms were collected  
303 and washed twice with M9 buffer containing 0.1% gelatin. Worms were placed on the  
304 center of an Edge Assay plate and excess M9 buffer was removed with the edge of a

305 Kimwipe. The number of worms that reached or did not reach the edge were counted at  
306 various time points to measure the Edge Assay completion rate.

307

### 308 **Isolation of mutants that show a progressive decline in locomotor function**

309 Wild-type N2 worms were mutagenized and cultured as previously described (Brenner,  
310 1974). Larval stage 4 worms were mutagenized by incubation in a 50 mM ethyl  
311 methanesulfonate solution for 4 h. EMS-mutagenized F2 adult day 1 worms were  
312 collected and washed twice with M9 buffer containing 0.1% aqueous gelatin. Worms  
313 were placed at the center of an Edge Assay plate and excess buffer was removed with  
314 the edge of a Kimwipe. After 15 min, worms that did not reach the edge were removed  
315 using an aspirator. Worms that reached the edge were maintained on the same plate  
316 until adult day 3. On adult day 3, worms were collected and washed with M9 buffer  
317 containing 0.1% gelatin and the Edge Assay was repeated on a new Edge Assay plate.  
318 Worms that were unable to reach the edge were collected as adult day 3 progressive  
319 locomotor deficit mutants. Worms that reached the edge were maintained on the same  
320 plate until adult day 5. On adult day 5, worms were collected and washed with M9  
321 buffer containing 0.1% gelatin and the Edge Assay was repeated on a new Edge Assay  
322 plate. Worms that were unable to reach the edge were collected as adult day 5  
323 progressive locomotor deficit mutants.

324

### 325 **Measurements of maximum speed and travel distance**

326 Worms were synchronized by placing five adult day 1 worms onto an NGM plate with  
327 food, and allowed to lay eggs for 3 h. When the offspring reached adult day 1, 15  
328 worms were picked randomly onto a 6 cm NGM plate without bacteria. After the worms  
329 moved away from the initial location with residual food, worms were again moved onto  
330 a different NGM plate without bacteria. Movement of worms was recorded for 1.0 min  
331 with a charge-coupled device camera INFINITY3-6URM (Lumenera Corporation,  
332 Ottawa, Canada). Images were analyzed using ImageJ and wrMTrck software  
333 ([www.phage.dk/plugins](http://www.phage.dk/plugins)) to produce maximum speed and travel distance (Nussbaum-  
334 Krammer et al., 2015). Measurements were made with the lid on in a temperature-  
335 controlled room set at 20 °C. At least three biological replicate plates of 15 worms each  
336 were measured for each strain. Worms that were lost during the video recording were  
337 not included in the analysis.

338

### 339 **Whole-genome DNA sequencing**

340 *C. elegans* DNA was sequenced using the MiSeq platform (Illumina, San Diego, CA).  
341 Libraries were prepared with an Illumina TruSeq Library Prep Kit. Mapping was

342 conducted with BWA software (Li and Durbin, 2009). Resulting files were converted to  
343 bam files, then to pileup format with Samtools (Li et al., 2009). Variant analysis was  
344 conducted using VarScan and SnpEff available on the Galaxy platform (Blankenberg et  
345 al., 2010; Cingolani et al., 2012; Giardine et al., 2005; Goecks et al., 2010; Koboldt et  
346 al., 2009). Mutation frequencies along the chromosome were calculated and visualized  
347 using CloudMap (Minevich et al., 2012).

348

### 349 **Transcriptional reporter expression**

350 A genomic fragment of 2090-bp immediately upstream of the start codon of the *elpc-2*  
351 gene was PCR-amplified using “5' *elpc-2p* overlap ppd95.79 107-” and “3' *elpc-2p*  
352 overlap ppd95.79 138-” primers, which have 15-bp overhangs that anneal immediately  
353 upstream of the GFP sequence in the pPD95.79 vector (See Supplementary Information  
354 for primers used). The pPD95.79 vector containing GFP was linearized by PCR using  
355 the “5' ppd95.79 107-” and “3' ppd95.79 138-” primers. The template vector was  
356 digested with restriction enzyme *DpnI* (New England Biolabs, Ipswich, MA), and the  
357 linearized vector was purified by Wizard SV Gel and PCR Clean-Up System (Promega,  
358 Madison, WI). The pure linearized vector and the *elpc-2* promoter were fused using an  
359 In-Fusion HD Cloning Kit (Takara, Kusatsu, Japan) to make the *elpc-2p::GFP*  
360 transcriptional reporter construct. The construct was microinjected into the gonads of  
361 wild-type worms at a concentration of 50 ng/μL. Worms that expressed the reporter  
362 construct were immobilized in 25 mM sodium azide and observed under a confocal  
363 microscope LSM710 (Carl Zeiss, Oberkochen, Germany). A z-stack image was created  
364 from images taken at 1 μm increments.

365

### 366 **Creation of double mutants**

367 Double mutant strains were created by crossing males of one strain with hermaphrodites  
368 of another. Double mutants were checked by extracting their DNA, amplifying a genomic  
369 fragment flanking the mutation site by PCR, and sequencing the PCR product by Sanger  
370 sequencing. See Supplementary Information for primer details.

371

### 372 **Statistics**

373 All results are expressed as means with a 95% confidence interval. Student's *t* test was  
374 used for pairwise comparisons with Excel 2010 (Microsoft). For multiple comparisons,  
375 one-way ANOVA was followed with Dunnett's post hoc test or Tukey's Honest  
376 Significant Difference test using R (Team, 2015). Statistical significance was set at \**P* <  
377 0.05; \*\**P* < 0.01; \*\*\**P* < 0.001.

378

379 **Data availability**

380 All isolated strains and plasmids are available upon request. Whole genome DNA  
381 sequencing data is available on NCBI Sequence Read Archive (PRJNA530333  
382 SAMN11311296 SAMN11311297).

383

384

385 **Acknowledgements**

386 We thank H. Goto, M. Kanda, M. Kawamitsu, S. Yamasaki and other DNA sequencing  
387 section members for technical assistance with whole genome sequencing. We are grateful  
388 to T. Murayama and E. Saita for helpful advice and support. We thank D. Van Vactor, B.  
389 Kuhn and members of the Maruyama unit for helpful discussions and comments. We are  
390 grateful to H. Ohtaki for administrative support. We thank Steve Aird for technical editing  
391 of this manuscript. We thank the *Caenorhabditis* Genetics Center, which is funded by  
392 NIH Office of Research Infrastructure Programs (P40 OD010440), for providing worm  
393 strains. We also thank the National Bioresource Project (Japan) for providing worm  
394 strains. K. K. was supported by Japan Society for the Promotion of Science KAKENHI  
(Grant 16J06404).

## 395   **References**

- 396   Bansal, A., Zhu, L.J., Yen, K., and Tissenbaum, H.A. (2015). Uncoupling lifespan and  
397   healthspan in *Caenorhabditis elegans* longevity mutants. Proc. Natl. Acad. Sci. U. S. A.  
398   112, E277-286.
- 399   Bento-Abreu, A., Jager, G., Swinnen, B., Rué, L., Hendrickx, S., Jones, A., Staats,  
400   K.A., Taes, I., Eykens, C., Nonneman, A., et al. (2018). Elongator subunit 3 (ELP3)  
401   modifies ALS through tRNA modification. Hum. Mol. Genet. 27, 1276–1289.
- 402   Blankenberg, D., Kuster, G. Von, Coraor, N., Ananda, G., Lazarus, R., Mangan, M.,  
403   Nekrutenko, A., and Taylor, J. (2010). Galaxy: A web-based genome analysis tool for  
404   experimentalists. Curr. Protoc. Mol. Biol. 1–21.
- 405   Brenner, S. (1974). *Caenorhabditis elegans*. Genetics 77, 71–94.
- 406   Cesari, M., Pahor, M., Lauretani, F., Zamboni, V., Bandinelli, S., Bernabei, R.,  
407   Guralnik, J.M., and Ferrucci, L. (2009). Skeletal muscle and mortality results from the  
408   InCHIANTI study. Journals Gerontol. - Ser. A Biol. Sci. Med. Sci. 64, 377–384.
- 409   Chen, C., Tuck, S., and Byström, A.S. (2009). Defects in tRNA Modification  
410   Associated with Neurological and Developmental Dysfunctions in *Caenorhabditis*  
411   *elegans* Elongator Mutants. PLoS Genet. 5, e1000561.
- 412   Cingolani, P., Platts, A., Wang, L.L., Coon, M., Nguyen, T., Wang, L., Land, S.J., Lu,  
413   X., and Ruden, D.M. (2012). A program for annotating and predicting the effects of  
414   single nucleotide polymorphisms, SnpEff: SNPs in the genome of *Drosophila*  
415   *melanogaster* strain *w* 1118; *iso-2*; *iso-3*. Fly (Austin). 6, 80–92.
- 416   Cohen, J.S., Srivastava, S., Farwell, K.D., Lu, H.M., Zeng, W., Lu, H., Chao, E.C., and  
417   Fatemi, A. (2015). ELP2 is a novel gene implicated in neurodevelopmental disabilities.  
418   Am. J. Med. Genet. Part A 167, 1391–1395.
- 419   Creppe, C., and Buschbeck, M. (2011). Elongator: an ancestral complex driving  
420   transcription and migration through protein acetylation. J. Biomed. Biotechnol. 2011,  
421   924898.
- 422   Dauden, M.I., Kosinski, J., Kolaj-Robin, O., Desfosses, A., Ori, A., Faux, C.,  
423   Hoffmann, N.A., Onuma, O.F., Breunig, K.D., Beck, M., et al. (2017). Architecture of  
424   the yeast Elongator complex. EMBO Rep. 18, 264–279.
- 425   Giardine, B., Riemer, C., Hardison, R.C., Burhans, R., Elnitski, L., Shah, P., Zhang, Y.,  
426   Blankenberg, D., Albert, I., Taylor, J., et al. (2005). Galaxy: A platform for interactive  
427   large-scale genome analysis. Genome Res. 15, 1451–1455.
- 428   Gidalevitz, T., Krupinski, T., Garcia, S., and Morimoto, R.I. (2009). Destabilizing  
429   protein polymorphisms in the genetic background direct phenotypic expression of  
430   mutant SOD1 toxicity. PLoS Genet. 5, e1000399.

- 431 Goecks, J., Nekrutenko, A., and Taylor, J. (2010). Galaxy: a comprehensive approach  
432 for supporting accessible, reproducible, and transparent computational research in the  
433 life sciences. *Genome Biol.* *11*, R86.
- 434 Grotewiel, M.S., Martin, I., Bhandari, P., and Cook-Wiens, E. (2005). Functional  
435 senescence in *Drosophila melanogaster*. *Ageing Res. Rev.* *4*, 372–397.
- 436 Hahm, J.-H., Kim, S., DiLoreto, R., Shi, C., Lee, S.-J. V., Murphy, C.T., and Nam, H.G.  
437 (2015). *C. elegans* maximum velocity correlates with healthspan and is maintained in  
438 worms with an insulin receptor mutation. *Nat. Commun.* *6*, 8919.
- 439 Huang, B., Johansson, M.J.O., and Byström, A.S. (2005). An early step in wobble  
440 uridine tRNA modification requires the Elongator complex. *RNA* *11*, 424–436.
- 441 Iwasa, H., Yu, S., Xue, J., and Driscoll, M. (2010). Novel EGF pathway regulators  
442 modulate *C. elegans* healthspan and lifespan via EGF receptor, PLC- $\gamma$ , and IP3R  
443 activation. *Aging Cell* *9*, 490–505.
- 444 Joseph, B.B., Blouin, N.A., and Fay, D.S. (2018). Use of a Sibling Subtraction Method  
445 for Identifying Causal Mutations in *Caenorhabditis elegans* by Whole-Genome  
446 Sequencing. *G3 (Bethesda)*. *8*, 669–678.
- 447 Justice, J.N., Carter, C.S., Beck, H.J., Gioscia-Ryan, R.A., McQueen, M., Enoka, R.M.,  
448 and Seals, D.R. (2014). Battery of behavioral tests in mice that models age-associated  
449 changes in human motor function. *Age (Omaha)*. *36*, 583–595.
- 450 Koboldt, D.C., Chen, K., Wylie, T., Larson, D.E., McLellan, M.D., Mardis, E.R.,  
451 Weinstock, G.M., Wilson, R.K., and Ding, L. (2009). VarScan: Variant detection in  
452 massively parallel sequencing of individual and pooled samples. *Bioinformatics* *25*,  
453 2283–2285.
- 454 Li, H., and Durbin, R. (2009). Fast and accurate short read alignment with Burrows-  
455 Wheeler transform. *Bioinformatics* *25*, 1754–1760.
- 456 Li, H., Handsaker, B., Wysoker, A., Fennell, T., Ruan, J., Homer, N., Marth, G.,  
457 Abecasis, G., and Durbin, R. (2009). The Sequence Alignment/Map format and  
458 SAMtools. *Bioinformatics* *25*, 2078–2079.
- 459 MacLeod, A., Karn, J., and Brenner, S. (1981). Molecular analysis of the *unc-54*  
460 myosin heavy-chain gene of *Caenorhabditis elegans*. *Nature* *291*, 386–390.
- 461 Maruyama, I.N., and Brenner, S. (1991). A phorbol ester/diacylglycerol-binding protein  
462 encoded by the *unc-13* gene of *Caenorhabditis elegans*. *Proc. Natl. Acad. Sci.* *88*,  
463 5729–5733.
- 464 Minevich, G., Park, D.S., Blankenberg, D., Poole, R.J., and Hobert, O. (2012).  
465 CloudMap: a cloud-based pipeline for analysis of mutant genome sequences. *Genetics*  
466 *192*, 1249–1269.

- 467 Nedialkova, D.D., and Leidel, S.A. (2015). Optimization of Codon Translation Rates  
468 via tRNA Modifications Maintains Proteome Integrity. *Cell* 161, 1606–1618.
- 469 Nussbaum-Krammer, C.I., Neto, M.F., Brielmann, R.M., Pedersen, J.S., and Morimoto,  
470 R.I. (2015). Investigating the Spreading and Toxicity of Prion-like Proteins Using the  
471 Metazoan Model Organism *C. elegans*. *J. Vis. Exp.* 1–15.
- 472 Otero, G., Fellows, J., Yang, L., De Bizemont, T., Dirac, A.M.G., Gustafsson, C.M.,  
473 Erdjument-Bromage, H., Tempst, P., and Svejstrup, J.Q. (1999). Elongator, a  
474 multisubunit component of a novel RNA polymerase II holoenzyme for transcriptional  
475 elongation. *Mol. Cell* 3, 109–118.
- 476 Reiner, D.J., Newton, E.M., Tian, H., and Thomas, J.H. (1999). Diverse behavioural  
477 defects caused by mutations in *Caenorhabditis elegans unc-43* CaM kinase II. *Nature*  
478 402, 199–203.
- 479 Sievers, F., Wilm, A., Dineen, D., Gibson, T.J., Karplus, K., Li, W., Lopez, R.,  
480 McWilliam, H., Remmert, M., Söding, J., et al. (2011). Fast, scalable generation of  
481 high-quality protein multiple sequence alignments using Clustal Omega. *Mol. Syst.*  
482 *Biol.* 7.
- 483 Simpson, C.L., Lemmens, R., Miskiewicz, K., Broom, W.J., Hansen, V.K., van Vught,  
484 P.W.J., Landers, J.E., Sapp, P., Van Den Bosch, L., Knight, J., et al. (2009). Variants of  
485 the elongator protein 3 (ELP3) gene are associated with motor neuron degeneration.  
486 *Hum. Mol. Genet.* 18, 472–481.
- 487 Solinger, J.A., Paolinelli, R., Klöß, H., Scorza, F.B., Marchesi, S., Sauder, U.,  
488 Mitsushima, D., Capuani, F., Stürzenbaum, S.R., and Cassata, G. (2010). The  
489 *Caenorhabditis elegans* Elongator Complex Regulates Neuronal  $\alpha$ -tubulin Acetylation.  
490 *PLoS Genet.* 6, e1000820.
- 491 Team, R.C. (2015). R: A language and environment for statistical computing [Internet].  
492 Vienna, Austria: R Foundation for Statistical Computing; 2015.
- 493 Tissenbaum, H.A. (2012). Genetics, Life span, Health Span, and the Aging Process in  
494 *Caenorhabditis elegans*. *J. Gerontol. A. Biol. Sci. Med. Sci.* 67, 503–510.
- 495

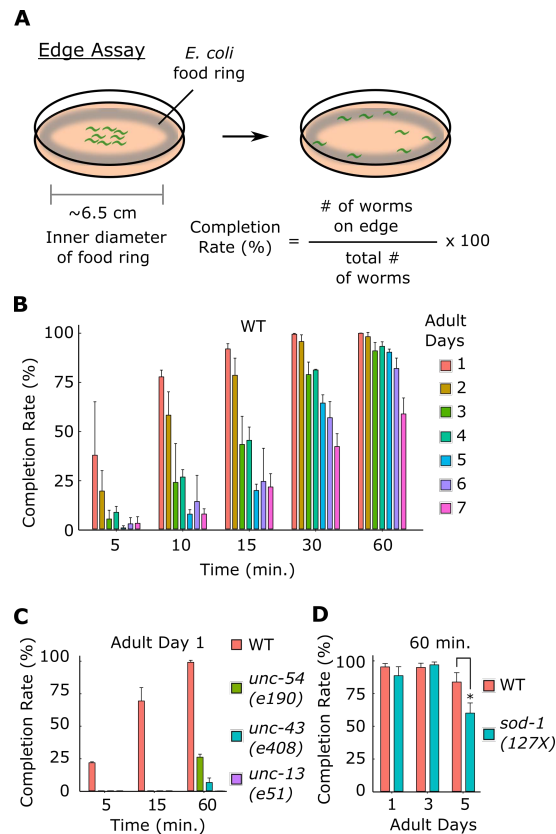

496

497 **Figure 1. “Edge Assay” can measure locomotor ability of worms**

498 (A) (*Left*) Schematic diagram of an Edge Assay plate immediately after placing worms at  
 499 the center of the plate. (*Right*) Schematic diagram of Edge Assay plate after most worms  
 500 reached the edge. (B) Edge Assay completion rates of wild-type worms from adult day 1  
 501 to 7 after 5, 10, 15, 30, and 60 min. (C) Completion rates for WT and developmental  
 502 mutants deficient in locomotor function, *unc-54(e190)*, *unc-43(e408)*, and (*unc-13(e51)*).  
 503 (D) Completion rates of WT and a previously reported *C. elegans* model of amyotrophic  
 504 lateral sclerosis (Hsa-*sod-1(127X)*). For Edge Assay experiments, n = 3 biological  
 505 replicate plates with each plate starting with approximately 100 worms per plate on adult  
 506 day 1. Error bars indicate 95% confidence intervals. \**P* < 0.05; Unpaired Student’s *t* test  
 507 for D.

508



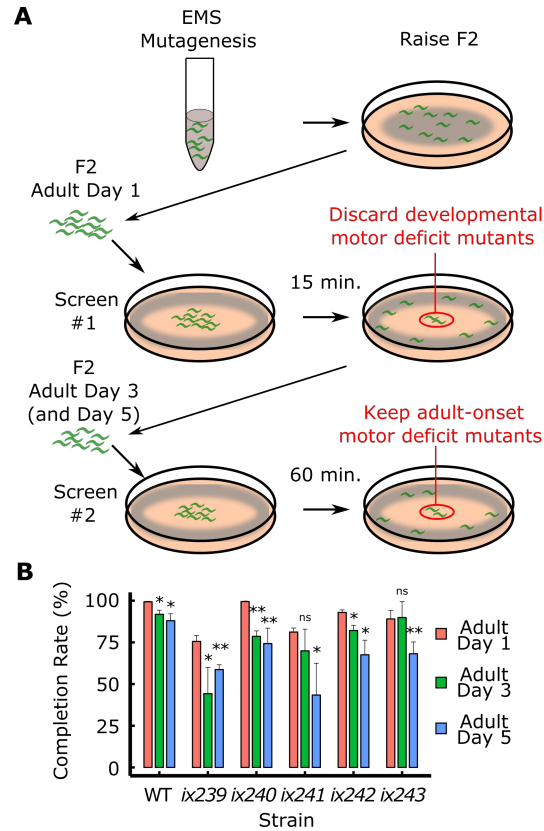

509

510 **Figure 2. Isolation of mutant strains that progressively lose locomotor ability**

511 (A) Schematic description of a forward genetic screen to isolate mutants that  
512 progressively lose locomotor ability. (B) Edge Assay completion rates of mutants  
513 identified from the screen. Error bars indicate 95% confidence intervals. n = 3 biological  
514 replicate plates, with each plate starting with approximately one hundred worms per plate  
515 on adult day 1. \* $P < 0.05$ ; \*\* $P < 0.01$ ; ns, not significant; Paired Student's  $t$  test vs. adult  
516 day 1 completion rate.

517

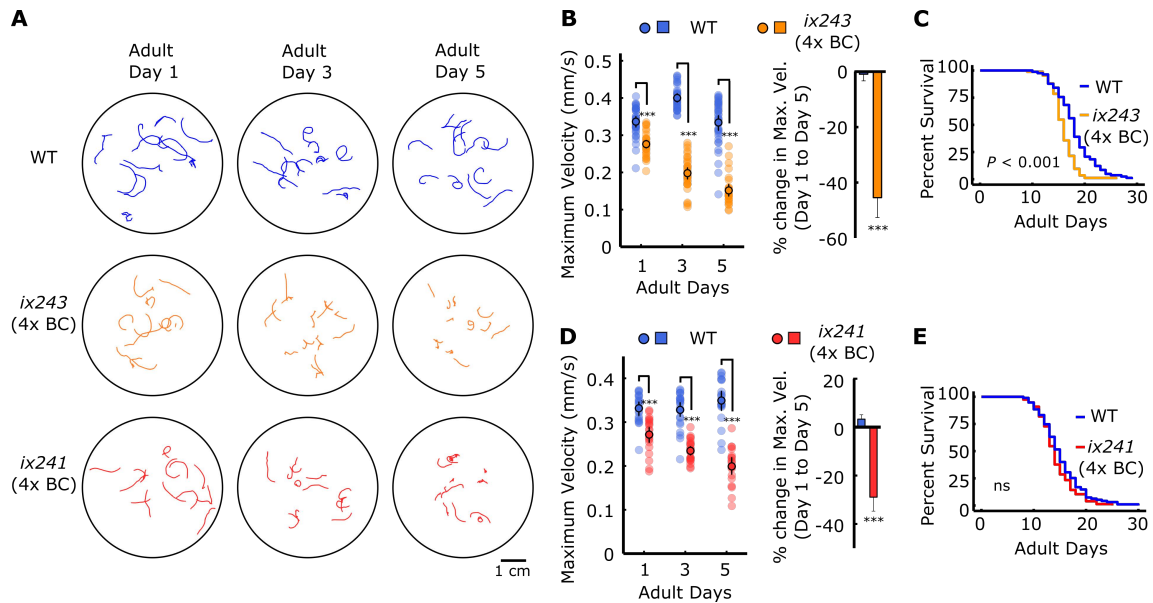

518

519 **Figure 3. *ix241* and *ix243* worms show progressive locomotor decline after four**  
 520 **backcrosses**

521 (A) Representative locomotor tracks from 1-min video recordings of wild-type (WT),  
 522 *ix243*(backcrossed four times (4x BC)), and *ix241*(4x BC) worms on adult days 1, 3, and  
 523 5 on plates with no food. n = 10–15 tracks per plate (some worms were unable to be  
 524 tracked for a full minute, and were removed from analysis) (B) (Left) Maximum velocities  
 525 of WT and *ix243*(4x BC) worms. (Right) Percent change in maximum velocity of WT and  
 526 *ix243*(4x BC) worms on adult day 5 compared to adult day 1. (C) Survival curve of WT  
 527 (n = 56 worms) and *ix243*(4x BC) (n = 89) worms.(D) (Left) Maximum velocities of WT  
 528 and *ix241*(4x BC) worms. (Right) Change in maximum velocity of WT and *ix241*(4x BC)  
 529 worms. (E) Survival curve of WT (n = 94) and *ix241*(4x BC) (n = 77) worms. Error bars  
 530 indicate 95% confidence intervals. For maximum velocity experiments, n = 30–45 worms  
 531 per strain for each day (10–15 worms from 3 biological replicate plates). For percent  
 532 change in maximum velocity graphs, n = 3 biological replicate plates. \*\*\* $P < 0.001$ ; ns,  
 533 not significant; Unpaired Student's *t* test for maximum velocity comparisons; Log-rank  
 534 test for lifespan comparisons.

535

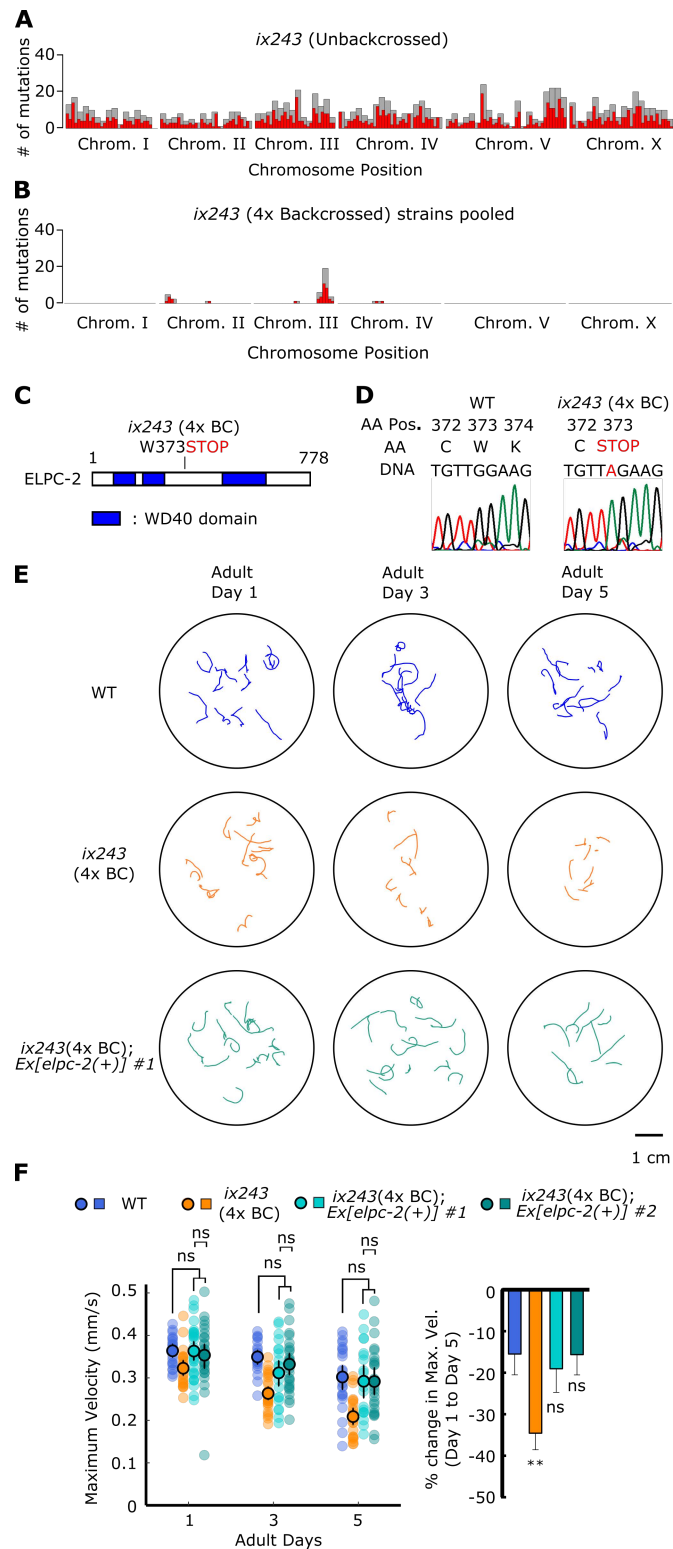

536

537 **Figure 4. *elpc-2* mutation causes locomotor deficits in the *ix243* mutant strain**

538 (A) Mutation frequency along each chromosome of *ix243* mutant strain before

539 backcrossing. Red bars indicate 0.5-Mb bins and grey bars indicate 1.0-Mb bins. (B)

540 Mutation frequency along each chromosome for pooled *ix243*(4x BC) worms. (C)

541 Schematic diagram of ELPC-2 protein and location of mutation site in *ix243* allele. (D)

542 *ix243* mutation site on ELPC-2 amino acid (AA) sequence and *elpc-2* DNA sequence. (E)

543 Representative locomotor tracks of WT, *ix243*(4x BC), and *ix243*(4x BC);*Ex[elpc-2(+)]*

544 #1 worms. (F) (*Left*) Maximum velocities of WT, *ix243*(4x BC), *ix243*(4x BC);*Ex[elpc-*  
545 *2(+)]* #1, and *ix243*(4x BC);*Ex[elpc-2(+)]* #2 worms. n = 30–45 worms per strain for  
546 each day (10–15 worms from 3 biological replicate plates). (*Right*) Percent change in  
547 maximum velocity of worms from left panel. n = 3 biological replicate plates. Error bars  
548 indicate 95% confidence intervals. \*\**P* < 0.01; ns, not significant ; One-way ANOVA  
549 with Dunnett’s post hoc test vs. WT.  
550

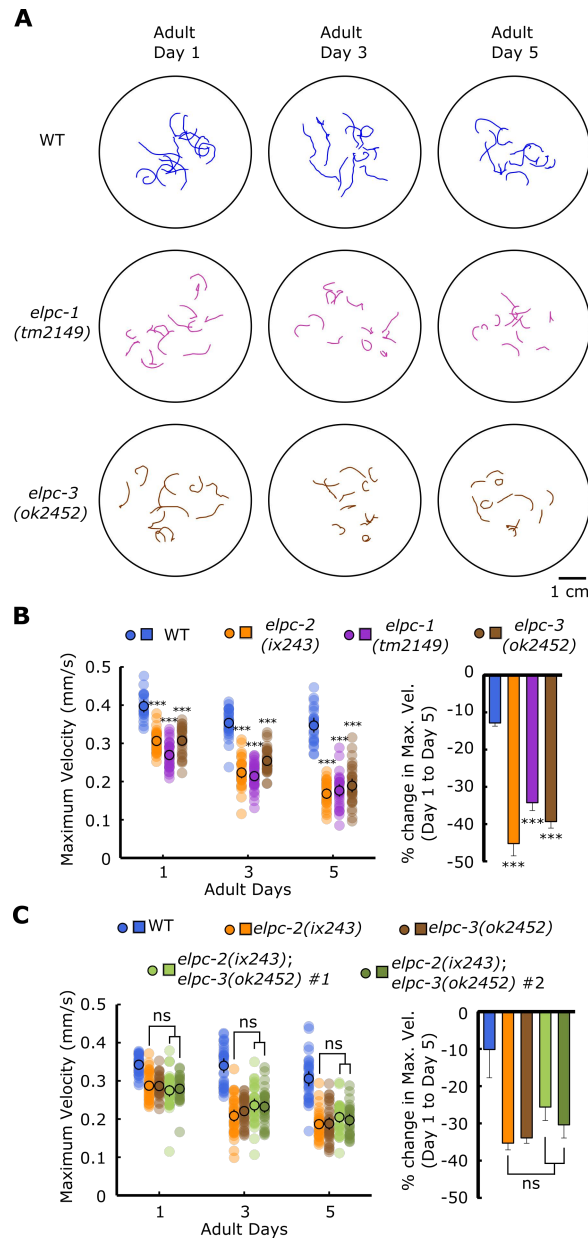

551

552 **Figure 5. The Elongator complex is required to maintain locomotor function**

553 (A) Representative locomotor tracks of WT, *elpc-1*(*tm2149*) and *elpc-3*(*ok2452*) worms.  
 554 n = 10–15 tracks per plate. (B) (Left) Maximum velocities of WT *elpc-1*(*tm2149*) and  
 555 *elpc-3*(*ok2452*) worms. (Right) Percent change in maximum velocity of worms from left  
 556 panel. (C) (Left) Maximum velocities of WT, *elpc-2*(*ix243*), *elpc-3*(*ok2452*), and *elpc-*  
 557 *2*(*ix243*);*elpc-3*(*ok2452*) worms. (Right) Percent change in maximum velocity of worms  
 558 from left panel. Error bars indicate 95% confidence intervals. For maximum velocity  
 559 experiments, n = 30–45 worms per strain for each day (10–15 worms from 3 biological  
 560 replicate plates). For percent change in maximum velocity graphs, n = 3 biological  
 561 replicate plates. \*\*\**P* < 0.001; ns, not significant; One-way ANOVA with Dunnett’s post  
 562 hoc test vs. WT for B; One-way ANOVA with Tukey’s post hoc test for C.

563

564

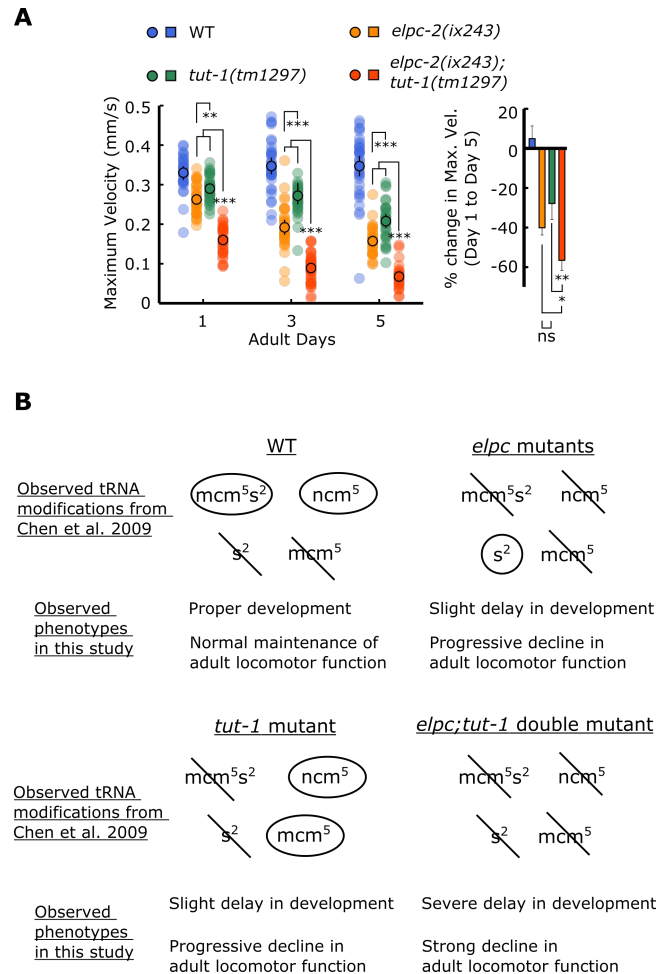

565

566 **Figure 6. *tut-1(tm1297)* mutant shows progressive decline in locomotor function**

567 (A) (Left) Maximum velocities of WT, *elpc-2(ix243)*, *tut-1(tm1297)*, and *elpc-*  
568 *2(ix243);tut-1(tm1297)* worms. (Right) Percent change in maximum velocity of worms  
569 from left panel. Error bars indicate 95% confidence intervals. n = 30–45 worms per strain  
570 for each day (10–15 worms from 3 biological replicate plates). For percent change in  
571 maximum velocity graphs, n = 3 biological replicate plates. \**P* < 0.05; \*\*\**P* < 0.001; ns,  
572 not significant; One-way ANOVA with Tukey’s post hoc test. (B) Summary of observed  
573 tRNA modifications in *elpc* and *tut-1* mutants from Chen et al. 2009, and summary of  
574 observed phenotypes in *elpc* and *tut-1* mutants from this study.

575

576

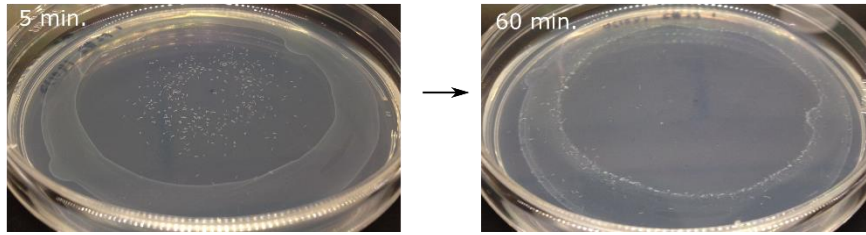

577

578 **Figure S1. Photos of Edge Assay**

579 (*Left*) Photo of Edge Assay after 5 min with worms moving away from the center. (*Right*)

580 Photo of Edge Assay after 60 min with worms reaching and remaining in the edge.

581

582 **Table S1. Number of screened genomes and isolated mutants**

|                                                    | EMS-mutagenesis I |       |       | EMS-mutagenesis II |       |       | Total |
|----------------------------------------------------|-------------------|-------|-------|--------------------|-------|-------|-------|
|                                                    | Day 1             | Day 3 | Day 5 | Day 1              | Day 3 | Day 5 |       |
| <b>Genomes Screened</b>                            | 400               |       |       | 600                |       |       |       |
| <b>Isolated mutants</b>                            |                   | 13    | 23    |                    | 17    | 17    | 70    |
| <b>Viable isolated mutants</b>                     |                   | 3     | 8     |                    | 9     | 2     | 22    |
| <b>Isolated mutants with reproducible deficits</b> |                   | 0     | 3     |                    | 2     | 0     | 5     |

583

584



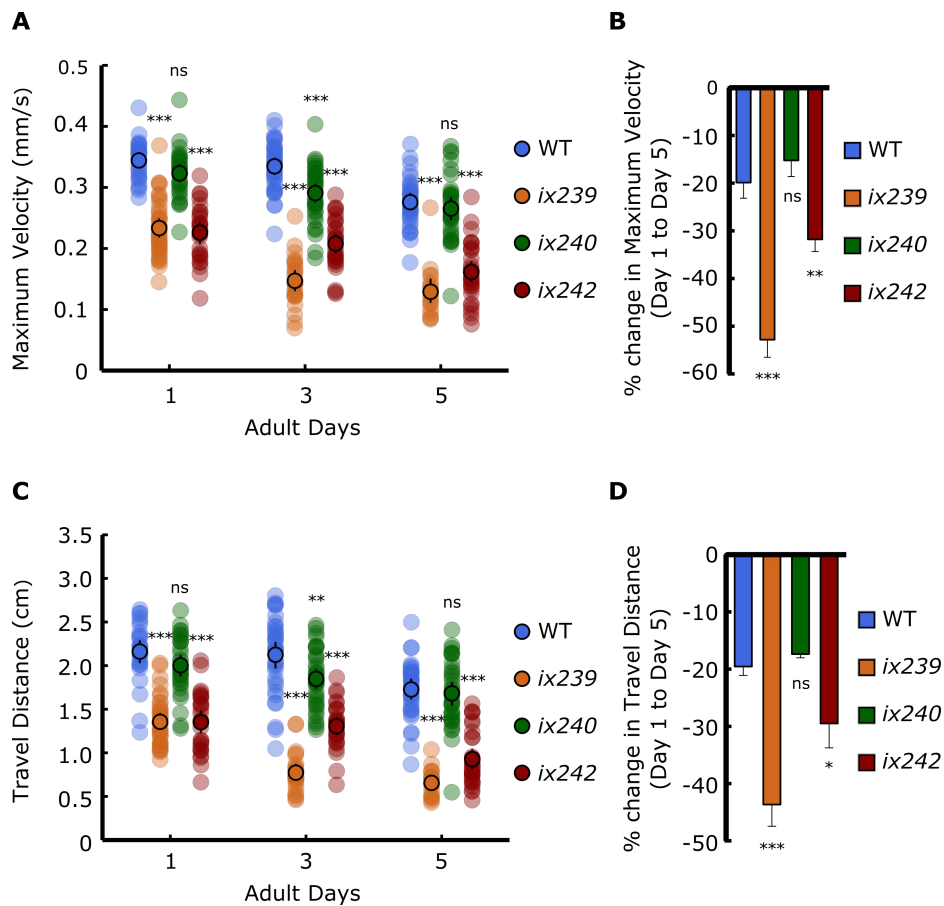

585

586 **Figure S2. Maximum velocity and travel distance of isolated mutants**

587 (A) Maximum velocities of WT, *ix239*, *ix240*, and *ix242* worms. (B) Percent change in  
588 maximum velocity of worms from A. (C) Travel distances of WT, *ix239*, *ix240*, and *ix242*  
589 worms. (D) Percent change in travel distance of worms from C. Error bars indicate 95%  
590 confidence intervals. For maximum velocity and travel distance experiments,  $n = 30-45$   
591 worms per strain for each day (10–15 worms from 3 biological replicate plates). For  
592 percent change in maximum velocity graphs,  $n = 3$  biological replicate plates.  $*P < 0.05$ ;  
593  $**P < 0.01$ ;  $***P < 0.001$ ; ns, not significant; One-way ANOVA with Dunnett's post hoc  
594 test vs. WT.

595

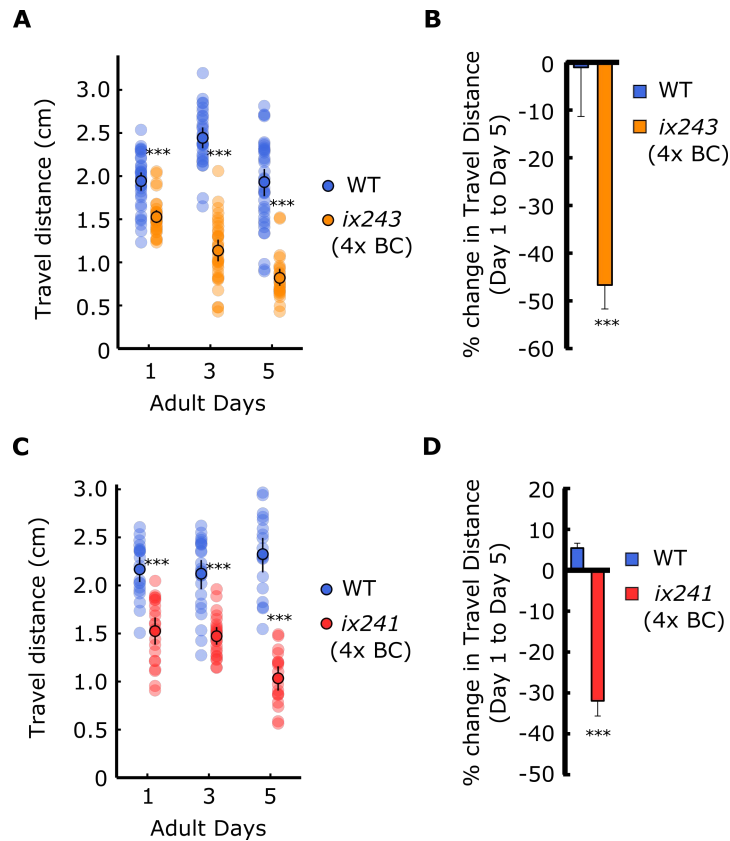

596

597 **Figure S3. *ix241* and *ix243* worms show progressive locomotor decline after four**  
598 **backcrosses**

599 (A) Travel distances of WT and *ix243* worms (backcrossed four times (4x BC)). (B)  
600 Percent change in travel distance of WT and *ix243*(4x BC) worms. (C) Travel distances  
601 of WT and *ix241*(4x BC) worms. (D) Percent change in travel distance of WT and  
602 *ix241*(4x BC) worms. For travel distance experiments, n = 30–45 worms per strain for  
603 each day (10–15 worms from 3 biological replicate plates). For percent change in travel  
604 distance graphs, n = 3 biological replicate plates. \*\*\* $P < 0.001$ ; Unpaired Student's *t* test  
605 vs. WT.

606

607 **Table S2. Lifespan Analysis**

| <b>Strain</b>                 | <b>Median Lifespan (adult days)</b> | <b><i>P</i> value vs WT (Log-rank test)</b> | <b>Worms (Counted/Total)</b> | <b>FUDR</b> |
|-------------------------------|-------------------------------------|---------------------------------------------|------------------------------|-------------|
| N2                            | 18                                  |                                             | 56/90                        | 25 µg/ml    |
| <i>ix243</i> (4x backcrossed) | 16                                  | <i>P</i> = 0.00078                          | 89/90                        | 25 µg/ml    |
| N2                            | 18                                  |                                             | 82/90                        | 25 µg/ml    |
| <i>ix243</i> (4x backcrossed) | 16                                  | <i>P</i> < 0.0001                           | 84/90                        | 25 µg/ml    |
| N2                            | 18                                  |                                             | 87/90                        | 25 µg/ml    |
| <i>ix243</i> (4x backcrossed) | 16                                  | <i>P</i> < 0.0001                           | 87/90                        | 25 µg/ml    |
| N2                            | 17                                  |                                             | 94/120                       | 0           |
| <i>ix241</i> (4x backcrossed) | 16                                  | <i>P</i> = 0.095                            | 77/120                       | 0           |
| N2                            | 14                                  |                                             | 66/90                        | 0           |
| <i>ix241</i> (4x backcrossed) | 15                                  | <i>P</i> = 0.12                             | 64/90                        | 0           |
| N2                            | 12                                  |                                             | 67/90                        | 0           |
| <i>ix241</i> (4x backcrossed) | 14                                  | <i>P</i> = 0.024                            | 74/90                        | 0           |

608

609

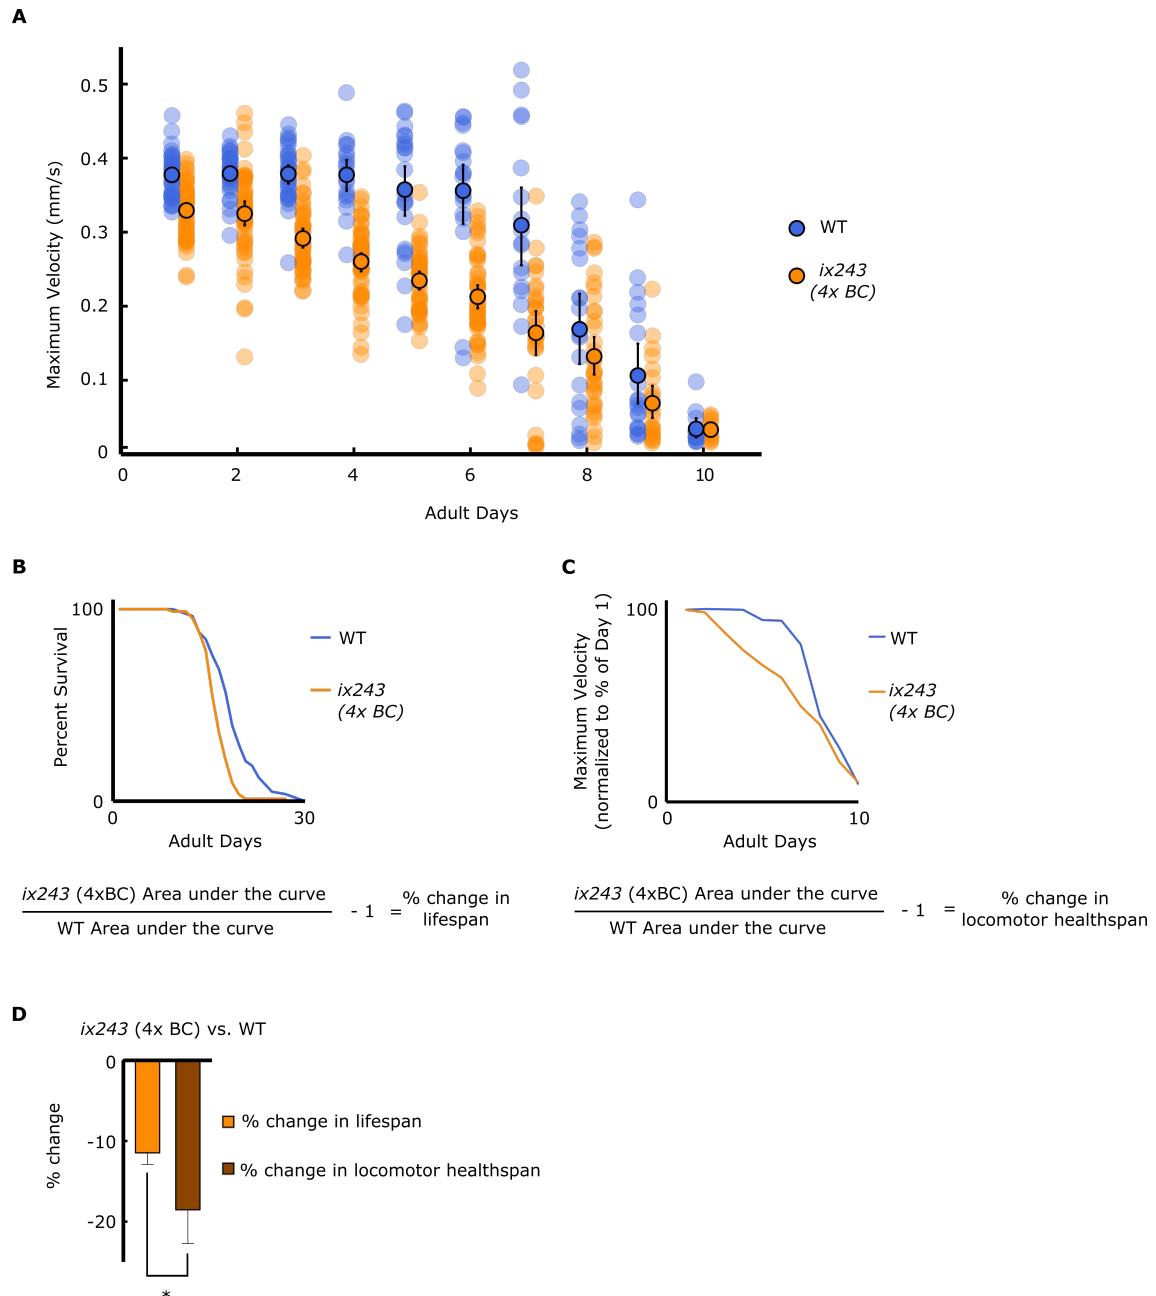

610

611 **Figure S4. Greater reduction in total locomotor healthspan compared to lifespan in**  
 612 ***ix243* worms**

613 (A) Maximum velocities of WT and *ix243* (4x backcrossed (4x BC)) worms. n = 30–45  
 614 worms per strain for each day (10–15 worms from 3 biological replicate plates). (B)  
 615 (Top) Representative survival curve of WT (n = 56 worms) and *ix243*(4x BC) worms (n  
 616 = 89 worms). (Bottom) Calculation method of percent change in lifespan. (C) (Top)  
 617 Representative decline in maximum velocity curve of WT and *ix243*(4x BC) worms. n =  
 618 30–45 worms per strain for each day (10–15 worms from 3 biological replicate plates).  
 619 (Bottom) Calculation method of percent change in locomotor healthspan. (D) Percent  
 620 change in lifespan (n = 3 biological replicate plates for WT and *ix243*(4xBC)) and  
 621 locomotor healthspan (n = 3 biological replicate plates for WT and *ix243*(4xBC)) of  
 622 *ix243*(4xBC) worms compared to WT. \**P* < 0.05; Unpaired Student's *t* test.

623 **Table S3. Development times of isolated mutant strains**

624 Development time from egg to first egg-lay (n=5 worms per strain).

| <b>Strain</b>                 | <b>Development Time (h)</b> | <b>% of WT</b> |
|-------------------------------|-----------------------------|----------------|
| WT                            | 70.4                        | 100.0%         |
| <i>ix239</i>                  | 74.4                        | 105.7%         |
| <i>ix240</i>                  | 71.2                        | 101.1%         |
| <i>ix241</i> (4x backcrossed) | 73.2                        | 104.0%         |
| <i>ix242</i>                  | 71.8                        | 102.0%         |
| <i>ix243</i> (4x backcrossed) | 80.2                        | 113.9%         |

625

626

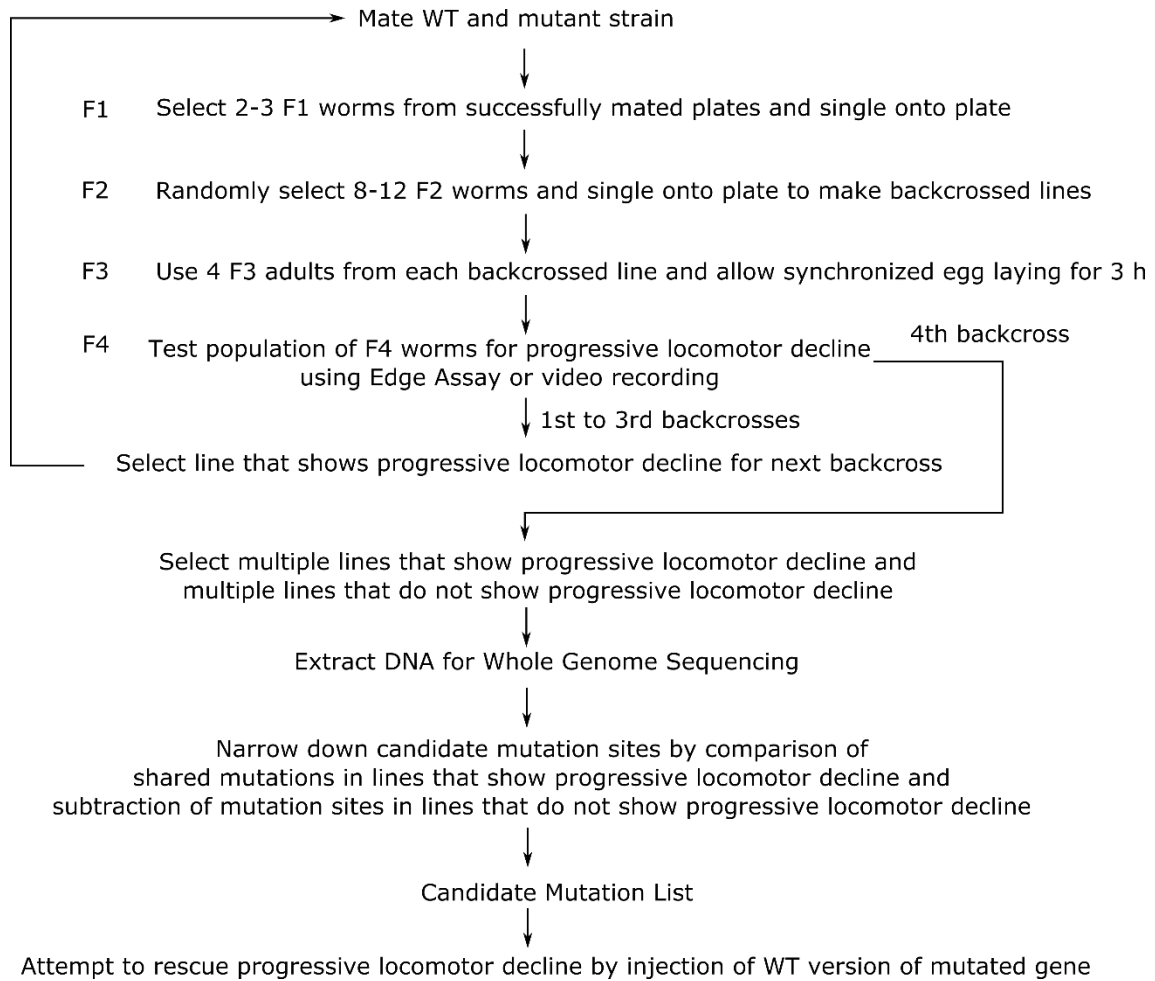

627

628 **Figure S5. Strategy to identify causative mutation site**

629

630 **Table S4. Remaining mutations in *ix243* mutant strains**

| Chrom. | Pos.     | Ref. | Alt.                                                                                                                                                                         | Gene                  | Mutation Type           | Effect   |
|--------|----------|------|------------------------------------------------------------------------------------------------------------------------------------------------------------------------------|-----------------------|-------------------------|----------|
| I      | 3428548  | A    | AGGCAGACCTAGCCCACCCTG<br>GGCAGACCTAGCCCACCCTG                                                                                                                                | K03E5.2               | downstream gene variant | modifier |
| I      | 14448378 | G    | GCGTCCGGTTTTGGGGTAGGTTT<br>CCACGGCGGCCGACAATTTCCG<br>AGTTTCGCCACTCACTATACTTA<br>ATCAGCAATTTTATAGTGAGTTG<br>CGAAACTCGGAAATTGTCGGCC<br>GTCGTGGATAACTACCCCAAAA<br>CCGGACGACCGGA | Y105E8A.27            | downstream gene variant | modifier |
| II     | 1465622  | C    | T                                                                                                                                                                            | Y51H7C.13             | missense variant        | moderate |
| II     | 1602489  | C    | T                                                                                                                                                                            | bath-47               | downstream gene variant | modifier |
| II     | 1717193  | C    | T                                                                                                                                                                            | btb-7                 | downstream gene variant | modifier |
| II     | 1915528  | C    | T                                                                                                                                                                            | math-31               | upstream gene variant   | modifier |
| II     | 2339259  | G    | T                                                                                                                                                                            | F43C11.6              | upstream gene variant   | modifier |
| II     | 2428896  | C    | T                                                                                                                                                                            | F42G2.2               | downstream gene variant | modifier |
| II     | 2477652  | T    | A                                                                                                                                                                            | tsr-1                 | upstream gene variant   | modifier |
| II     | 8975684  | G    | T                                                                                                                                                                            | tomm-40               | upstream gene variant   | modifier |
| III    | 577387   | T    | TAAAAATTT<br>AACAAAA                                                                                                                                                         | Y55B1AL.1             | downstream gene variant | modifier |
| III    | 1704981  | A    | T                                                                                                                                                                            | Y22D7AR.10            | upstream gene variant   | modifier |
| III    | 7406703  | A    | T                                                                                                                                                                            | linc-165              | upstream gene variant   | modifier |
| III    | 7439448  | C    | T                                                                                                                                                                            | linc-165-ah-12        | intergenic region       | modifier |
| III    | 11024784 | G    | A                                                                                                                                                                            | Y48A6B.16             | upstream gene variant   | modifier |
| III    | 11416475 | G    | A                                                                                                                                                                            | Y47D3B.13             | upstream gene variant   | modifier |
| III    | 11549303 | G    | A                                                                                                                                                                            | Y66D12A.14            | downstream gene variant | modifier |
| III    | 11816202 | G    | A                                                                                                                                                                            | C18D11.1              | upstream gene variant   | modifier |
| III    | 11895783 | G    | A                                                                                                                                                                            | faah-5                | upstream gene variant   | modifier |
| III    | 12134837 | G    | A                                                                                                                                                                            | Y75B8A.6              | upstream gene variant   | modifier |
| III    | 12156042 | G    | A                                                                                                                                                                            | linc-87               | upstream gene variant   | modifier |
| III    | 12190456 | G    | A                                                                                                                                                                            | Y75B8A.54             | upstream gene variant   | modifier |
| III    | 12200963 | G    | A                                                                                                                                                                            | Y75B8A.44             | downstream gene variant | modifier |
| III    | 12223827 | G    | A                                                                                                                                                                            | Y75B8A.16             | missense variant        | moderate |
| III    | 12407309 | G    | A                                                                                                                                                                            | tat-1                 | missense variant        | moderate |
| III    | 12427755 | G    | A                                                                                                                                                                            | Y49E10.16             | upstream gene variant   | modifier |
| III    | 12476529 | G    | A                                                                                                                                                                            | Y49E10.33             | upstream gene variant   | modifier |
| III    | 12498064 | C    | T                                                                                                                                                                            | Y111B2A.3             | synonymous variant      | low      |
| III    | 12678743 | G    | A                                                                                                                                                                            | elpc-2                | stop gained             | high     |
| III    | 12701690 | G    | A                                                                                                                                                                            | spin-4                | downstream gene variant | modifier |
| III    | 12750669 | A    | T                                                                                                                                                                            | irld-60               | missense variant        | moderate |
| III    | 12810002 | G    | A                                                                                                                                                                            | BE10.5                | upstream gene variant   | modifier |
| III    | 12838123 | G    | A                                                                                                                                                                            | Y37D8A.4              | synonymous variant      | low      |
| III    | 12892115 | G    | A                                                                                                                                                                            | unc-71                | upstream gene variant   | modifier |
| III    | 12923518 | G    | A                                                                                                                                                                            | Y37D8A.16             | upstream gene variant   | modifier |
| III    | 12924071 | G    | A                                                                                                                                                                            | mrps-10               | upstream gene variant   | modifier |
| III    | 13352002 | G    | A                                                                                                                                                                            | F53A2.9               | downstream gene variant | modifier |
| III    | 13453318 | G    | A                                                                                                                                                                            | cua-1                 | upstream gene variant   | modifier |
| III    | 13578898 | G    | A                                                                                                                                                                            | T05D4.5               | upstream gene variant   | modifier |
| IV     | 6722231  | C    | T                                                                                                                                                                            | Y73B6A.6-<br>Y73B6A.2 | intergenic region       | modifier |
| IV     | 7597770  | G    | A                                                                                                                                                                            | tag-80                | synonymous variant      | low      |
| IV     | 7597783  | T    | A                                                                                                                                                                            | tag-80                | missense variant        | moderate |
| IV     | 17276360 | A    | AT                                                                                                                                                                           | ghn-5                 | upstream gene variant   | modifier |

631

632

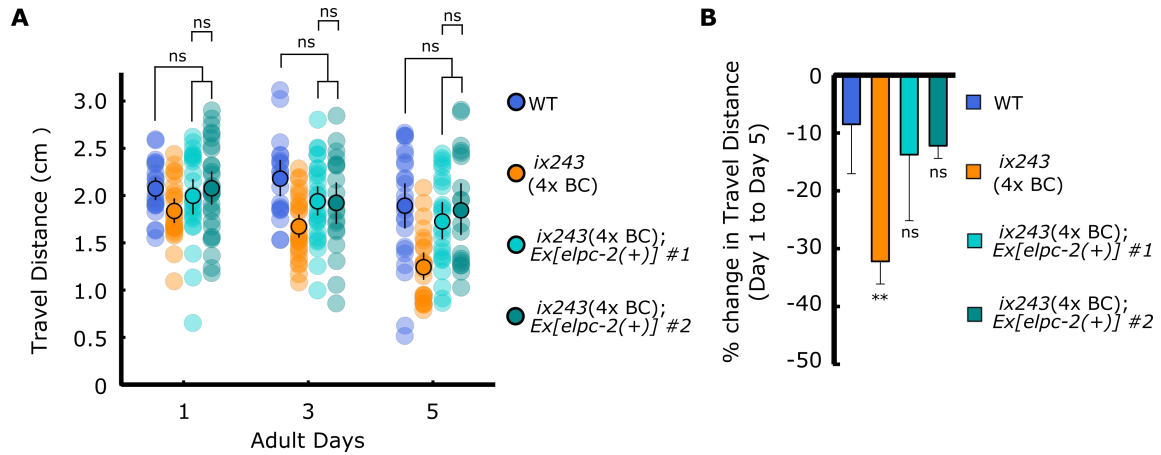

633

634 **Figure S6. Wild-type *elpc-2* gene rescues progressive decline in locomotor function**  
635 **of the *ix243* mutant strain**

636 (A) Travel distance of WT, *ix243*(4x BC), *ix243*(4x BC);*Ex[elpc-2(+)]* #1, and *ix243*(4x  
637 BC);*Ex[elpc-2(+)]* #2 worms. n = 30–45 worms per strain for each day (10–15 worms  
638 from 3 biological replicate plates). (B) Percent change in travel distance of worms from  
639 A. n = 3 biological replicate plates. \*\**P* < 0.01; \*\*\**P* < 0.001; ns, not significant; One-  
640 way ANOVA with Dunnett's post hoc test vs. WT.

641



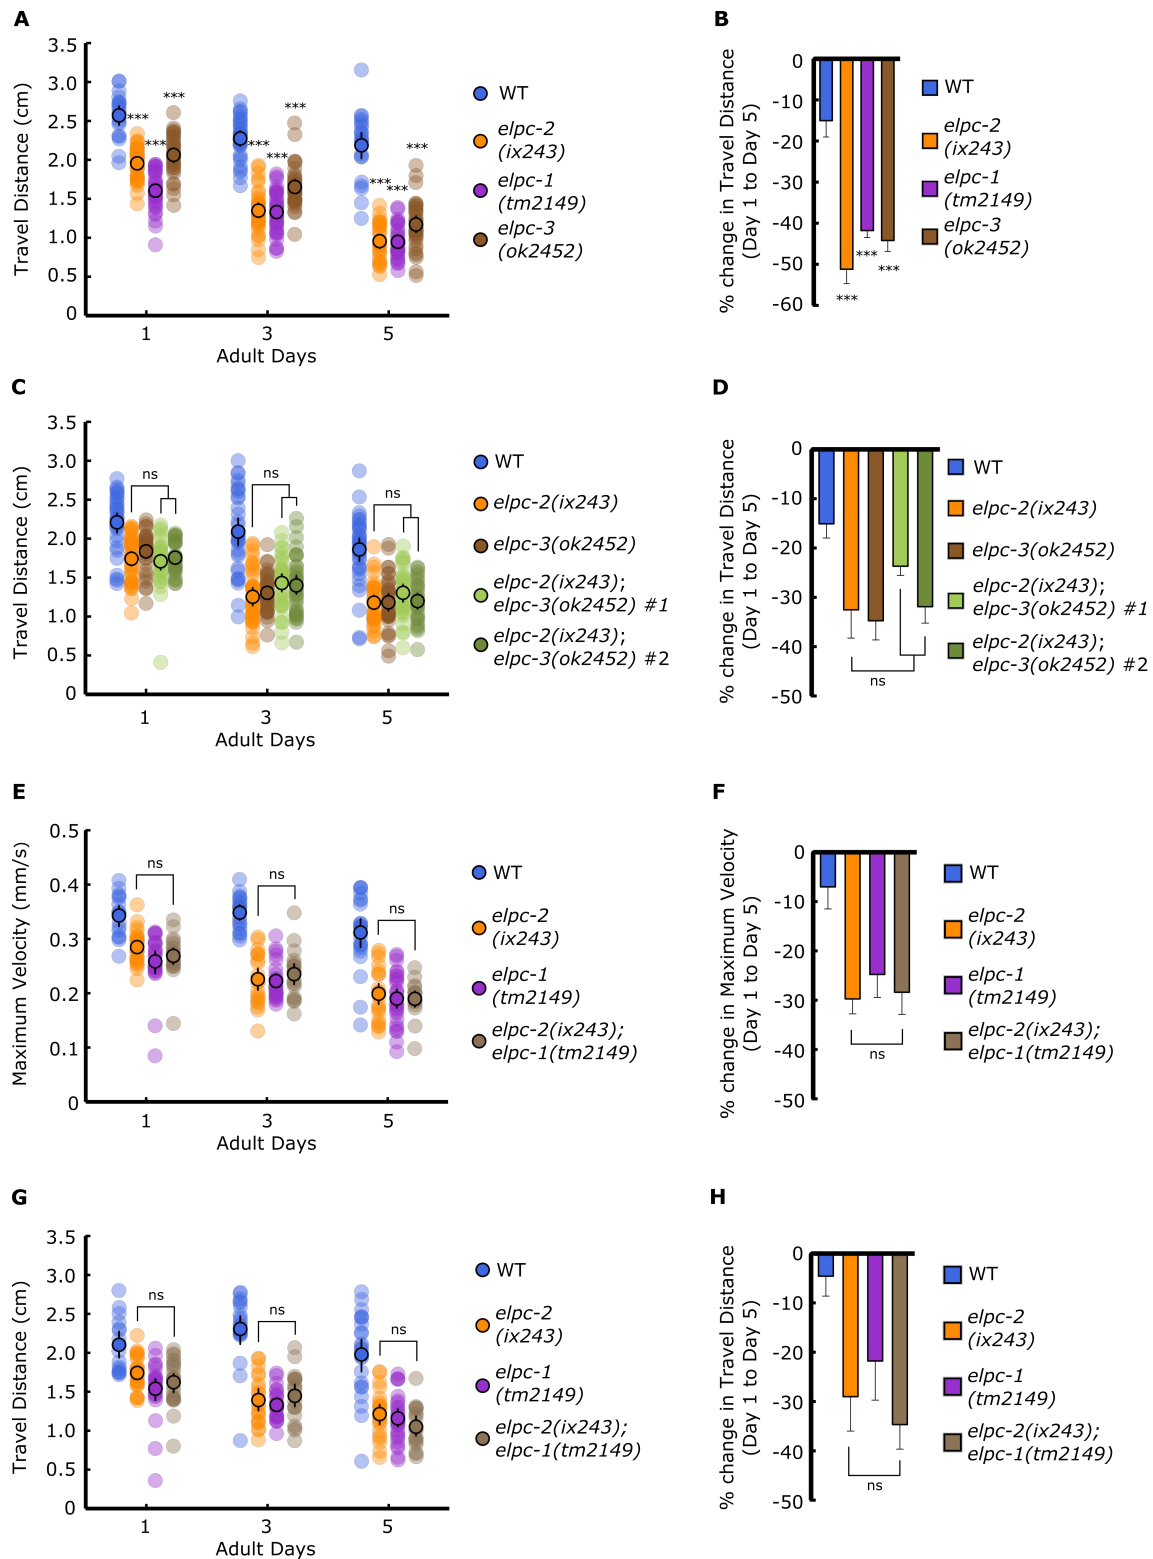

642

643 **Figure S7. The Elongator complex is required to maintain adult locomotor function**

644 (A) Travel distances of WT, *elpc-1(tm2149)* and *elpc-3(ok2452)* worms. (B) Percent  
 645 change in travel distance of worms from A. (C) Travel distances of WT, *elpc-2(ix243)*,  
 646 *elpc-3(ok2452)*, and *elpc-2(ix243); elpc-3(ok2452)* worms. (D) Percent change in travel  
 647 distance of worms from C. (E) Maximum velocities of WT, *elpc-2(ix243)*, *elpc-1(tm2149)*,  
 648 and *elpc-1(tm2149); elpc-2(ix243)* worms. (F) Percent change in maximum velocity of

649 worms from E. (G) Travel distances of WT, *elpc-2(ix243)*, *elpc-1(tm2149)*, and *elpc-*  
650 *1(tm2149);elpc-2(ix243)* worms. (H) Percent change in travel distance of strains from G.  
651 For maximum velocity and travel distance experiments, n = 30–45 worms per strain for  
652 each day (10–15 worms from 3 biological replicate plates). For percent change in  
653 maximum velocity graphs, n = 3 biological replicate plates. \*\*\* $P < 0.001$ ; ns, not  
654 significant; One-way ANOVA with Dunnett's post hoc test vs. WT for A, B; One-way  
655 ANOVA with Tukey's post hoc test for C–H.  
656

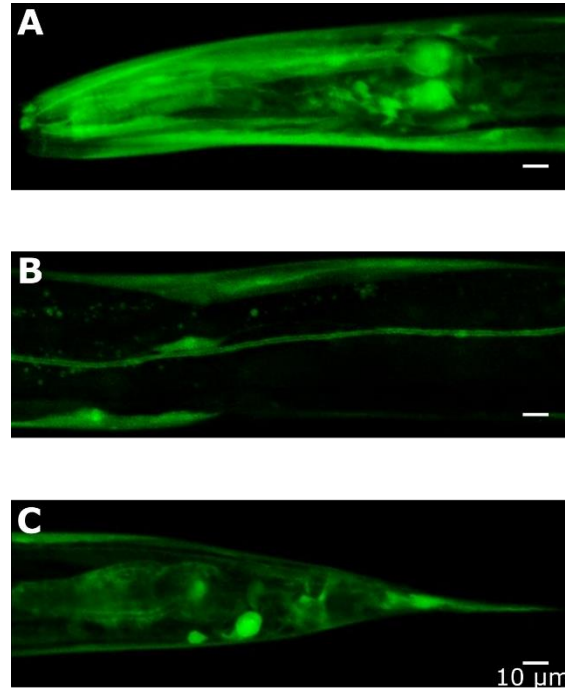

657

658 **Figure S8. Expression pattern of *elpc-2* transcriptional GFP fusion**

659 (A) *elpc-2p::GFP* expression in pharynx, neurons, and head muscles. (B) *elpc-2p::GFP*

660 expression in body wall muscles and canal cell. (C) *elpc-2p::GFP* expression in

661 coelomocytes, intestine, and tail. Scale bars: 10 µm.

662

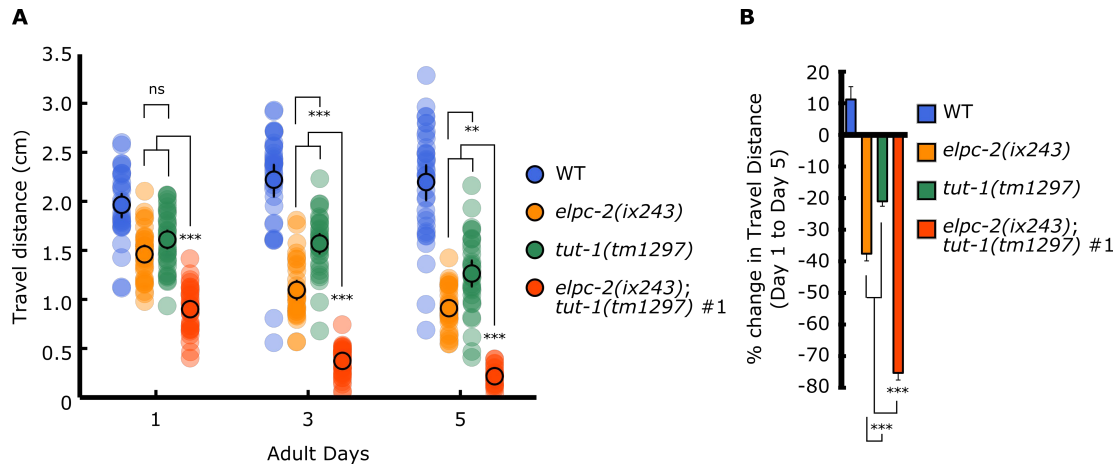

663

664 **Figure S9. *tut-1(tm1297)* mutant shows progressive decline in locomotor function**

665 (A) Travel distances of WT, *elpc-2(ix243)*, *tut-1(tm1297)*, and *elpc-2(ix243);tut-*  
666 *1(tm1297)* worms. n = 30–45 worms per strain for each day (10–15 worms from 3  
667 biological replicate plates). (B) Percent change in travel distance of worms from A. Error  
668 bars indicate 95% confidence intervals. n = 3 biological replicate plates. \* $P < 0.05$ ; \*\* $P$   
669  $< 0.01$ ; \*\*\* $P < 0.001$ ; ns, not significant; One-way ANOVA with Tukey's post hoc test.

670

671 **Table S5. Development times of *tut-1(tm1297)* and *elpc-2(ix243);tut-1(tm1297)***  
672 **mutants**

673 Development time from egg to first egg-lay (n = 5 worms per strain).

| <b>Strain</b>                      | <b>Development Time (h)</b> | <b>% of WT</b> |
|------------------------------------|-----------------------------|----------------|
| WT                                 | 70.4                        | 100.0%         |
| <i>tut-1(tm1297)</i>               | 82.0                        | 116.5%         |
| <i>elpc-2(ix243);tut-1(tm1297)</i> | 145.4                       | 206.5%         |

674

675

|        |               |     |                                                                |     |
|--------|---------------|-----|----------------------------------------------------------------|-----|
| Q6IA86 | ELP2_HUMAN    | 1   | -----NIVPVLETSIVF-CENRNRVGLNWSGPRGLAFGTSCSVVLYD-FLKRVV         | 51  |
| Q9NEW7 | Q9NEW7_CAEEEL | 1   | MKIEEFISASVNPESHCLTAK-----TAPLVAYASSLOIAVQTIKODSEV             | 48  |
|        |               |     | :*:*:*:*:*:*:*:*:*:*:*:*:*:*:*:*:*:*:*:*:*:*:*:*:*:*:*:*:*:*:  |     |
| Q6IA86 | ELP2_HUMAN    | 52  | ----TINLNGHTARVNCIOWICIKODGSPSTELVSGGSDNOVTHNEIEDNOLLKAVHLOGH  | 106 |
| Q9NEW7 | Q9NEW7_CAEEEL | 49  | GVIKSTISERRHOKPIITVL-KRLKSSSEIVADEFVTGGVDSRWVLLKLRGEHVYVADLTGC | 107 |
|        |               |     | :*:*:*:*:*:*:*:*:*:*:*:*:*:*:*:*:*:*:*:*:*:*:*:*:*:*:*:*:*:    |     |
| Q6IA86 | ELP2_HUMAN    | 107 | EGPVYAVHAVYORRTSDPALCTLIISAAADSAVRLNSKKGPEVHCLOTLNFGNGFALALC   | 166 |
| Q9NEW7 | Q9NEW7_CAEEEL | 108 | DGSVGSVCGCVEDGRK--VVAAMVSETSNGFHAMVTSIGDLLNSTEIKL-DHKAFALC     | 164 |
|        |               |     | :*:*:*:*:*:*:*:*:*:*:*:*:*:*:*:*:*:*:*:*:*:*:*:*:*:*:*:*:*:    |     |
| Q6IA86 | ELP2_HUMAN    | 167 | LSFLPNTDVPILACGNDDCRIHFIAQ--ONDOFQKVLSCGHEDMIRGVEIAAFGRDLFL    | 224 |
| Q9NEW7 | Q9NEW7_CAEEEL | 165 | LDATSIQSVLLAVGTSKRFEVLYGESADKKSFSRLTISVAGHTDWIHSIAFNPNPDLV     | 224 |
|        |               |     | :*:*:*:*:*:*:*:*:*:*:*:*:*:*:*:*:*:*:*:*:*:*:*:*:*:*:*:*:*:    |     |
| Q6IA86 | ELP2_HUMAN    | 225 | ASCSDCLIRIKLYIKSTSLETO-----DDNIRLKENITETIENESVKIAFAVITL        | 276 |
| Q9NEW7 | Q9NEW7_CAEEEL | 225 | ASAGQTYVRLWAIETPEDEKSENIREDSSTTPDELTSANLESINY----TPYRCSH       | 280 |
|        |               |     | :*:*:*:*:*:*:*:*:*:*:*:*:*:*:*:*:*:*:*:*:*:*:*:*:*:*:*:*:*:    |     |
| Q6IA86 | ELP2_HUMAN    | 277 | TVLAGHENLVNAVHNPVYFKDGLVQPVRLLSASMDKTMILNAPDESGVHLEQVRYGE      | 336 |
| Q9NEW7 | Q9NEW7_CAEEEL | 281 | AVIQGHDDVHSTVNSND-----GRVLLTASSDKTCIINKE--IDNLRDDVRLGI         | 329 |
|        |               |     | :*:*:*:*:*:*:*:*:*:*:*:*:*:*:*:*:*:*:*:*:*:*:*:*:*:*:*:*:*:    |     |
| Q6IA86 | ELP2_HUMAN    | 337 | VGGN-TLGFYDCQFN-----EDGSMIIAHAFGALHLNKONTVNPREITPEIVI          | 384 |
| Q9NEW7 | Q9NEW7_CAEEEL | 330 | VGGQAGFFAAVSSSLDKDSGKIAENVVSSYFGLHCNKSTDEKTFNLTALPHT           | 389 |
|        |               |     | :*:*:*:*:*:*:*:*:*:*:*:*:*:*:*:*:*:*:*:*:*:*:*:*:*:*:*:*:*:    |     |
| Q6IA86 | ELP2_HUMAN    | 385 | SGHFDGVODLVNDP----EGEFTIITVGTDOTTRLFAPWKRKQDSQVTHHEIARPOIHGYD  | 440 |
| Q9NEW7 | Q9NEW7_CAEEEL | 390 | GGHVGVEVRVDWHRSDDGSGLMSVGDOTTRVFAKNG----RQSYVEIARPOVHGHD       | 445 |
|        |               |     | :*:*:*:*:*:*:*:*:*:*:*:*:*:*:*:*:*:*:*:*:*:*:*:*:*:*:*:*:*:    |     |
| Q6IA86 | ELP2_HUMAN    | 441 | LKCLAMINRFQFVSGADEKVLRFESAPRNVEVFCALITQSLNHVLCNODSLPEGATVP     | 500 |
| Q9NEW7 | Q9NEW7_CAEEEL | 446 | MOCLSFVNPISIFVSGAEKVFRAFRAPKSFVKSLAISQVPTKESFGSD-LAEFGACVP     | 504 |
|        |               |     | :*:*:*:*:*:*:*:*:*:*:*:*:*:*:*:*:*:*:*:*:*:*:*:*:*:*:*:*:*:    |     |
| Q6IA86 | ELP2_HUMAN    | 501 | ALGLSNKAVFOGDIASQPSDEEELLTSTGFEYQVAFQPSILTEPPTDHLQNTLWPEV      | 560 |
| Q9NEW7 | Q9NEW7_CAEEEL | 505 | ALGLSNKPMVEGETVDGE-----HNEEDAFRAARVVLTSPTDITLQNTLWPEQ          | 554 |
|        |               |     | :*:*:*:*:*:*:*:*:*:*:*:*:*:*:*:*:*:*:*:*:*:*:*:*:*:*:*:*:*:    |     |
| Q6IA86 | ELP2_HUMAN    | 561 | OKLYGHGYEIFCVTICNSKTLASACKAAKKEHAAIILNNTTSNKQVONLVFHS-LTVTQ    | 620 |
| Q9NEW7 | Q9NEW7_CAEEEL | 555 | HKLYGHGYEYVAVTANPTIGVILATACKSSHVEHSVVLNLSMNSKSEIIGHQLTVTQI     | 614 |
|        |               |     | :*:*:*:*:*:*:*:*:*:*:*:*:*:*:*:*:*:*:*:*:*:*:*:*:*:*:*:*:*:    |     |
| Q6IA86 | ELP2_HUMAN    | 621 | AFSPNEKFLLAVERDRTWLNKQODTISPEFEPVSLFAFTNKITSVHSRIIWSCDWSPD     | 680 |
| Q9NEW7 | Q9NEW7_CAEEEL | 615 | ANPSPGTRLLTVSRDRTAKLYTEKNGEVDGFDYD----CVWTSGRQHTRIIWACDWIDD    | 669 |
|        |               |     | :*:*:*:*:*:*:*:*:*:*:*:*:*:*:*:*:*:*:*:*:*:*:*:*:*:*:*:*:*:    |     |
| Q6IA86 | ELP2_HUMAN    | 681 | SKYFFITGSRDKKVVVWGECDSTDDCIEHNIGPCSSVLDVGGAVTAVSVCPLHPSORYVV   | 740 |
| Q9NEW7 | Q9NEW7_CAEEEL | 670 | EH-FVITASRQKVIVVAESAGQTAPKAT-----VKLDEPVTA-----IAAVSKDVI       | 714 |
|        |               |     | :*:*:*:*:*:*:*:*:*:*:*:*:*:*:*:*:*:*:*:*:*:*:*:*:*:*:*:*:*:    |     |
| Q6IA86 | ELP2_HUMAN    | 741 | AVGLECGKICLYTNKKTQVPEINDWTHCVETSQSOSHT--LAIRKLCNKNCSGKTEQKE    | 798 |
| Q9NEW7 | Q9NEW7_CAEEEL | 715 | VAGLQGTGELIVLRFDSGLH-----VIEKIGANRIPIDSAVLRIRFSKNGRK-----      | 761 |
|        |               |     | :*:*:*:*:*:*:*:*:*:*:*:*:*:*:*:*:*:*:*:*:*:*:*:*:*:*:*:*:*:    |     |
| Q6IA86 | ELP2_HUMAN    | 799 | AEGAENLHFA SCGEHTVYKTHRVNKCAL                                  | 826 |
| Q9NEW7 | Q9NEW7_CAEEEL | 762 | -----LAVATTDAKLRIFNVSQ---                                      | 778 |
|        |               |     | :*:*:*:*:*:*:*:*:*:*:*:*:*:*:*:*:*:*:*:*:*:*:*:*:*:*:*:*:*:    |     |

676

677 **Figure S10. Amino acid alignment of *C. elegans* ELPC-2 and human ELP2**

678 *C. elegans* ELPC-2 and human ELP2 were aligned using Clustal Omega (Sievers et al.,  
 679 2011). An asterisk (\*) indicates positions that are conserved; colon (: ) indicates positions  
 680 that are strongly similar (> 0.5 in the Gonnet PAM 250 matrix); period (.) indicates  
 681 positions that are weakly similar (< 0.5 in the Gonnet PAM 250 matrix).

682

683 **Supplementary Information: Strain list**

| <b>Strain</b> | <b>Genotype</b>                                          | <b>Obtained From</b>                 |
|---------------|----------------------------------------------------------|--------------------------------------|
| CB408         | <i>unc-43(e408) IV</i>                                   | CGC                                  |
| CB190         | <i>unc-54(e190) I</i>                                    | CGC                                  |
| MT7929        | <i>unc-13(e51)</i>                                       | CGC                                  |
| AM725         | <i>rmIs290 [unc-54p ::Hsa-sod-1 (127X)::YFP]</i>         | CGC                                  |
| VC1937        | <i>elpc-3(ok2452) V</i>                                  | CGC                                  |
| CF1038        | <i>daf-16(mu86) I</i>                                    | CGC                                  |
| n/a           | <i>elpc-1(tm2149) I</i>                                  | National BioResource Project (Japan) |
| n/a           | <i>tut-1(tm1297) IV</i>                                  | National BioResource Project (Japan) |
| OF1260        | <i>ix239</i>                                             | This study                           |
| OF1261        | <i>ix240</i>                                             | This study                           |
| OF1262        | <i>ix241</i>                                             | This study                           |
| OF1263        | <i>ix241</i> (4x backcrossed)                            | This study                           |
| OF1264        | <i>ix242</i>                                             | This study                           |
| OF1265        | <i>elpc-2(ix243) III</i>                                 | This study                           |
| OF1266        | <i>elpc-2(ix243) III</i> (4x backcrossed)                | This study                           |
| OF1267        | <i>elpc-2(ix243) III;ixEx244[elpc-2(+);lin-44p::RFP]</i> | This study                           |
| OF1268        | <i>elpc-2(ix243) III;ixEx245[elpc-2(+);lin-44p::RFP]</i> | This study                           |
| OF1269        | <i>elpc-2(ix243) III;ixEx246[lin-44p::RFP]</i>           | This study                           |
| OF1270        | <i>ixEx247[lin-44p::RFP]</i>                             | This study                           |
| OF1271        | <i>elpc-1(tm2149) I;elpc-2(ix243) III</i>                | This study                           |
| OF1272        | <i>elpc-2(ix243) III;elpc-3(ok2454) V</i> (#1)           | This study                           |
| OF1273        | <i>elpc-2(ix243) III;elpc-3(ok2454) V</i> (#2)           | This study                           |
| OF1289        | <i>elpc-2(ix243) III;tut-1(tm1297) IV</i>                | This study                           |

684

685

686 **Supplementary Information: Primer list**

| Primer Name                             | 5'-3' Sequence                                    |
|-----------------------------------------|---------------------------------------------------|
| 5' <i>elpc-2p</i> (2090-bp upstream)    | gataagtgacatgccgctgcgtccttac                      |
| 3' <i>elpc-2UTR</i> (851-bp downstream) | aagagacagcgtctgattcttgaacggta                     |
| 5' <i>elpc-2</i> snp                    | aaatgaattttcggcacaaccccaaaaa                      |
| 3' <i>elpc-2</i> snp                    | ttcgcgaaaactctcgtagtctgacctg                      |
| 5' <i>elpc-1</i> del                    | gaaaagcatcgagttgtccacttgaatcac                    |
| 3' <i>elpc-1</i> del                    | ctttcagttgaattctggcatctctcaa                      |
| 5' <i>elpc-3</i> del                    | taatagaaccagatcgagtttggcagatg                     |
| 3' <i>elpc-3</i> del                    | aatgcatcgtatgtggttaggcggtaaac                     |
| 5' <i>elpc-2p</i> overlap ppd95.79 107- | gggtaccggtagaaaaaatgaaaatcgaagaagaatttatctctgctag |
| 3' <i>elpc-2p</i> overlap ppd95.79 138- | agttcttctccttactcatctgggaaacattaaagatttcaatttcgc  |
| 5' ppd95.79 107-                        | atgagtaaaggagaagaacttttactggag                    |
| 3' ppd95.79 138-                        | ttttctaccggtaccctccaagcaagggtc                    |

687

688

689
